1 **Large-Scale Validation Study of an Improved Semi-Autonomous Urine Cytology**  
2 **Assessment Tool: AutoParis-X**

3 Joshua J. Levy PhD<sup>1,2,3,4,\*</sup>, Natt Chan MS<sup>4</sup>, Jonathan D. Marotti MD<sup>1,6</sup>, Darcy A. Kerr MD<sup>1,6</sup>,  
4 Edward J. Gutmann MD, AM<sup>1,6</sup>, Ryan E. Glass MD<sup>5</sup>, Caroline P. Dodge<sup>7</sup>, Arief A. Suriawinata  
5 MD<sup>1,6</sup>, Brock Christensen PhD<sup>3,8,9</sup>, Xiaoying Liu MD<sup>1,6,†</sup>, Louis J. Vaickus MD, PhD<sup>1,6,†</sup>

- 6 1. Emerging Diagnostic and Investigative Technologies, Department of Pathology and  
7 Laboratory Medicine, Dartmouth Hitchcock Medical Center, Lebanon, NH, 03766
- 8 2. Department of Dermatology, Dartmouth Hitchcock Medical Center, Lebanon, NH, 03766
- 9 3. Department of Epidemiology, Dartmouth College Geisel School of Medicine, Hanover,  
10 NH, 03756
- 11 4. Program in Quantitative Biomedical Sciences, Dartmouth College Geisel School of  
12 Medicine, Hanover, NH, 03756
- 13 5. UPMC East, Pittsburg, PA, 15146
- 14 6. Dartmouth College Geisel School of Medicine, Hanover, NH, 03756
- 15 7. Cambridge Health Alliance, Cambridge, MA, 02139
- 16 8. Department of Molecular and Systems Biology, Dartmouth College Geisel School of  
17 Medicine, Hanover, NH, 03756
- 18 9. Department of Community and Family Medicine, Dartmouth College Geisel School of  
19 Medicine, Hanover, NH, 03756

20  
21 \* To whom correspondence should be addressed: [joshua.j.levy@dartmouth.edu](mailto:joshua.j.levy@dartmouth.edu)

22 † Authors contributed equally

23  
24 **Author Contributions**

25 JL and LV: conceptualization, formal analysis, funding acquisition, investigation, methodology,  
26 project administration, resources, software, supervision, validation, visualization, writing -  
27 original draft; XL, JM, DK, EG, RG, CD, LV: data curation; all authors: writing - review and  
28 editing

29  
30 **Conflict of Interest**

31 None to disclose.

32  
33

34 **Abstract**

35 Adopting a computational approach for the assessment of urine cytology specimens has the  
36 potential to improve the efficiency, accuracy and reliability of bladder cancer screening, which  
37 has heretofore relied on semi-subjective manual assessment methods. As rigorous, quantitative  
38 criteria and guidelines have been introduced for improving screening practices, e.g., The Paris  
39 System for Reporting Urinary Cytology (TPS), algorithms to emulate semi-autonomous  
40 diagnostic decision-making have lagged behind, in part due to the complex and nuanced nature  
41 of urine cytology reporting. In this study, we report on a deep learning tool, AutoParis-X, which  
42 can facilitate rapid semi-autonomous examination of urine cytology specimens. Through a large-  
43 scale retrospective validation study, results indicate that AutoParis-X can accurately determine  
44 urothelial cell atypia and aggregate a wide-variety of cell and cluster-related information across a  
45 slide to yield an Atypia Burden Score (ABS) that correlates closely with overall specimen atypia,  
46 predictive of TPS diagnostic categories. Importantly, this approach accounts for challenges  
47 associated with assessment of overlapping cell cluster borders, which improved the ability to  
48 predict specimen atypia and accurately estimate the nuclear-to-cytoplasm (NC) ratio for cells in  
49 these clusters. We developed an interactive web application that is publicly available and open-  
50 source, which features a simple, easy-to-use display for examining urine cytology whole-slide  
51 images (WSI) and determining the atypia level of specific cells, flagging the most abnormal cells  
52 for pathologist review. The accuracy of AutoParis-X (and other semi-automated digital  
53 pathology systems) indicates that these technologies are approaching clinical readiness and  
54 necessitates full evaluation of these algorithms via head-to-head clinical trials.

55  
56

## 57 **Introduction**

58 Urothelial carcinoma is highly prevalent (9<sup>th</sup> most common worldwide) and has the highest  
59 recurrence rate among all forms of cancer (74%)<sup>1,2</sup>. The treatment and management of urothelial  
60 carcinoma requires follow-up urine cytology (UC), expensive, painful chemotherapy, and/or  
61 invasive cystoscopy procedures for long periods of time (typically the remainder of the patient's  
62 life), necessitating the development and implementation of less invasive screening and follow up  
63 measures<sup>3</sup>.

64  
65 The detection and screening for bladder cancer has greatly improved since the earliest recorded  
66 evaluation of hematuria was recorded in the papyrus of Kahun, circa 1900 B.C.. In 1550 B.C., it  
67 was suggested that hematuria originated from “worms in the belly”<sup>4</sup>. A causative agent, *S.*  
68 *haematobium*, was identified in 1854 by Theodor Bilharz<sup>5,6</sup>. In 1947, Dr. George Papanicolaou,  
69 widely considered the father of modern cytopathology, proposed a formal system for evaluation  
70 of malignant cells exfoliated from the bladder's epithelium, which has largely remained intact<sup>7,8</sup>.  
71 Over the past half-century, efforts to rigorously define quantitative assessment criteria (e.g.,  
72 nuclear-to-cytoplasm (NC) ratio, chromatin structure, etc.) and improve specimen preparation  
73 methods have sought to resolve remaining ambiguity. Yet, traditional cytological approaches are  
74 still hampered by inter-rater variability, specimen quality issues, and the tendency towards  
75 ‘hedging’ to the atypical category<sup>9–12</sup>.

76  
77 In recent years, The Paris System for Reporting Urinary Cytology (TPS), formulated in 2013,  
78 published in 2016, and updated in 2022, has emerged as a more quantitative and reproducible  
79 reporting system bladder cancer<sup>13–17</sup>. TPS criteria are applied to assign one of four main ordered

80 categories (negative, atypical urothelial cells, suspicious for high-grade urothelial carcinoma,  
81 positive for high-grade urothelial carcinoma) based on the following criteria for a positive  
82 diagnosis: (1) at least five malignant urothelial cells (updated to ten in 2022), (2) an NC ratio at  
83 or above 0.7, (3) nuclear hyperchromasia, (4) markedly irregular nuclear membrane, and (5)  
84 coarse/clumped chromatin<sup>2</sup>. It is often easier to evaluate specimens that have clear-cut  
85 diagnoses, either negative or positive, than those that are atypical or suspicious. Atypical  
86 specimens are those that are hedged against a negative diagnosis, while suspicious specimens are  
87 those that are hedged against a positive diagnosis, but allow fewer than five malignant cells to be  
88 detected. Unsurprisingly, the two indeterminate designations suffer from poor inter-rater  
89 variability<sup>12,17</sup>.

90  
91 There are a number of drawbacks to cytological assessments, despite improvements in screening  
92 criteria: cytology slides are far less structured than traditional histological specimens (as they are  
93 a random dispersion of cells); there is high inter-rater variability; and the workload involved  
94 often leads to cytologist exhaustion— all of these factors increase the likelihood of  
95 misclassification. Furthermore, TPS does not introduce rigorous screening criteria for urothelial  
96 cell clusters, instead mainly relying on aggregates of individual cellular estimates. Systems to  
97 automate the assessment of cytology specimens can provide more quantitative assessments of  
98 atypia, while improving reliability and reproducibility.

99  
100 Advances in cytopathology vis-à-vis increased automation can bring several benefits to all  
101 stakeholders in the healthcare space<sup>18–22</sup>. The adoption of computer assisted Papanicolaou  
102 (‘Pap’) test screening helped laboratories address overwhelming numbers of tests that formerly

103 required manual screening, leading to inevitable workflow backlogs and diagnostic errors  
104 resulting from overwork. The end result of this practice was the drafting of the CLIA-88  
105 regulations concerning cytotechnologist workload limits and the development of semi-automated  
106 Pap screening devices such as the FocalPoint™ GS and the ThinPrep® Imaging System (TIS)  
107 <sup>23,24</sup>. The commercial success of these automated systems in the gynecologic cytology market  
108 provides a window into the possibilities of future computational applications in urine cytology  
109 <sup>25-33</sup>. The factors which drove the creation of automated gynecologic cytology systems are  
110 similarly present in urine cytology: to improve clinical outcomes and integrate smoothly within  
111 the daily workflows of cytopathology laboratories. Outside of gynecologic cytology, several  
112 computational methods have been developed for cytological applications in screening cancers of  
113 varying types of specimens <sup>18,34-36</sup>. For instance, efforts have been made to screen potential  
114 malignancies in thyroid fine-needle aspirations (FNA), liquid-based lung cancer specimens,  
115 pancreaticobiliary FNA, breast lesions, and urine specimens <sup>37-42</sup>.

116

117 Systems to automate cytology screening can provide more quantitative assessments of atypia  
118 while improving reliability, precision and reproducibility of findings. State-of-the-art approaches  
119 leverage deep learning, which relies on the use of artificial neural networks (ANN– inspired by  
120 the central nervous system), to construct indicators of atypia that can be formulated into  
121 diagnostic tests. For instance, Sanghvi et al. developed a semi-autonomous diagnostic decision  
122 aid for bladder cancer using a deep learning algorithm to quantify abnormal cytomorphological  
123 features <sup>43</sup>. The algorithm detected urothelial cells using QuPath, urothelial clusters using  
124 density-based clustering and used convolutional neural networks for scoring cells for atypia (e.g.,  
125 NC ratio, hyperchromasia, etc.). Although the effectiveness of QuPath, the scoring algorithms,

126 and density-based clustering was not fully discussed, the study showed promising results in  
127 estimating overall atypia and could potentially improve bladder cancer screening. However, it  
128 should be noted that other studies have highlighted the limitations of QuPath in disaggregation of  
129 cells within clusters in favor of detection-based approaches, indicating a need for further  
130 refinement of the algorithm <sup>44-47</sup>.

131  
132 We previously developed the AutoParis system to automatically report the presence of malignant  
133 cells across cytology specimens through cross-tabulation of the degree of atypia and NC ratio for  
134 all urothelial cells in the preparation <sup>48</sup>. Cross-tabulation is used to generate an Atypia Burden  
135 Score (ABS) to directly classify the specimen. The current AutoParis system operates by: 1)  
136 using connected component analysis (morphometry) and watershedding to separate individual  
137 cells from cell clusters within the specimen; 2) estimating the NC ratio of the cell using a  
138 segmentation neural network to separate the nucleus and cytoplasmic components on a pixel-by-  
139 pixel basis; 3) simultaneously assigning the cell as urothelial and recording whether the cell is  
140 atypical (atypia score) from a classifier which separates negative urothelial cells, positive  
141 urothelial cells, leukocytes, red blood cells (RBCs), debris, squamous, and crystals; and 4)  
142 generating digital images in which the cells are arranged in order of atypia, which could be  
143 helpful to pathologists. Limitations in current classification systems for urine cytology include <sup>20</sup>:  
144 1) confounding by the presence of blood, high cellularity, neobladders (abundant degenerated  
145 enterocytes) and scanning artifacts. Other previously unaccounted for cell types may also  
146 confound classifiers (e.g., polyomavirus encrusted cells conflated with positive urothelial cells,  
147 leukocytes vs. clusters of leukocytes, urothelial cells with no nucleus present, renal tubule cells)  
148 <sup>49</sup>; 2) morphometry algorithms may not scale to hundreds of thousands of cells at maximal

149 resolution; 3) density-based clustering / watershedding is likely insufficient to separate  
150 overlapping cells; 4) using a single classifier does not adequately separate the tasks of  
151 determining whether a cell is both urothelial and atypical; 6) orientation and size of cell could  
152 confound the classifier; and 7) existing graphical displays for communicating the burden of  
153 atypia are static rather than dynamic.

154  
155 We set out to improve on the AutoParis classification tool by addressing the above limitations  
156 and additionally trained the models using a more expansive dataset– we dub the new tool  
157 **AutoParis-X (AP-X)**. In AutoParis-X, we addressed challenges associated with cell cluster  
158 assessment by developing an artificial intelligence tool that uses detection models to localize  
159 urothelial cells, overlapping cell boundaries, dense regions of significant overlap, and identify  
160 visual markers of urothelial atypia. By breaking clusters into their constituent architectural  
161 components, this preprocessing tool facilitates downstream association studies and predictive  
162 algorithms that incorporate quantitative cluster-level features. The cell border identification tool  
163 helped develop a more comprehensive understanding of urothelial cell cluster atypia as it  
164 pertains to bladder cancer screening. In comparison to the previous AutoParis study, which was  
165 validated on a small well-curated test set, we performed a large-scale retrospective validation of  
166 AutoParis-X on nearly 1,300 real-world specimens from internal cohorts. In this manuscript, we  
167 discuss improvements to the previous approach and its potential for real-time assessment as a  
168 mature diagnostic decision aid.

169

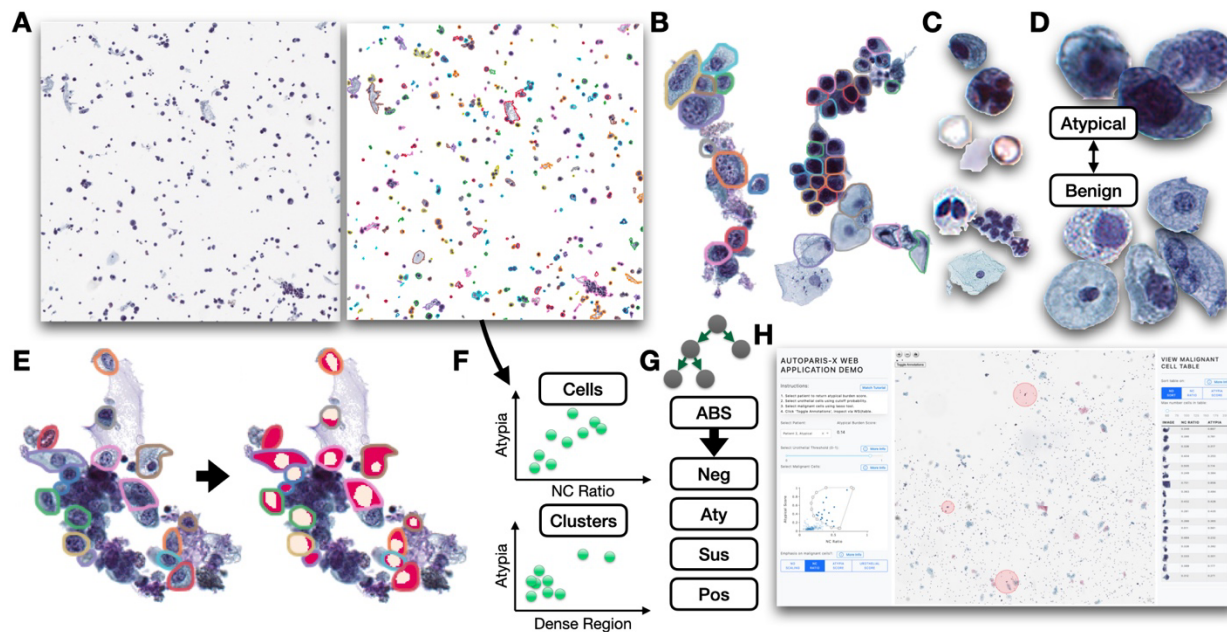

170  
 171 **Figure 1: AutoParis-X specimen processing workflow:** **A)** Connected component analysis  
 172 isolates candidate cells and cell clusters; **B)** Individual cells and cytoplasmic borders isolated  
 173 from cell clusters using BorderDet; **C)** UroNet isolates specific cell types across slide, in order: i)  
 174 urothelial cells, ii) polyomavirus infected cells, iii) crystals, debris, RBCs, iv) leukocytes, v)  
 175 leukocyte clusters, vi) squamous cells; **D)** AtyNet estimates atypia score for each urothelial cell;  
 176 **E)** UroSeg calculates the NC ratio for each urothelial cell after being isolated using the  
 177 connected component analysis or BorderDet; **F)** example rich information frame cell and cluster  
 178 level scores, which cross tabulate statistics across the slide; **G)** mixed effects machine learning  
 179 method predicts atypical burden score which correlates with the reported diagnosis; **H)**  
 180 cytopathologists can rapidly assess the specimen using the AutoParis-X web application  
 181  
 182

## 183 **Methods**

### 184 **Specimen Collection and Slide Processing**

185 A total of 1,303 urine specimens were collected across 140 bladder cancer patients (median of 8  
 186 specimens per patient; IQR: [8-13]) from 2008 to 2019 at Dartmouth-Hitchcock Medical Center.  
 187 Forty-seven of these specimens were used to curate data for training the cell and cluster-level  
 188 machine learning models (*cell and cluster-level training and validation cohort*). Four specimens  
 189 were removed due to equivocal findings and/or excessive confluent cellularity. AutoParis-X was



190 further trained and validated on 1,252 specimens after curating slide-level cell/cluster predictors  
191 (*slide-level training and validation cohorts*; see **Calculation of Cell and Cluster Slide-Level**  
192 **Scores**). The specimens were prepared using ThinPrep® and Papanicolaou staining before being  
193 examined microscopically<sup>24</sup>. The urine slides were scanned using a Leica Aperio-AT2 scanner  
194 at 40× resolution and were stored as 70% quality SVS files representing whole slide images. The  
195 slides were manually focused (by a trained technician) on a single plane during scanning, and z-  
196 stacking was not used. Patient and slide-level characteristics from the *slide-level training and*  
197 *validation cohorts* can be found in **Table 1**. All slides were assessed by a group of five  
198 cytopathologists using TPS criteria (negative for high grade urothelial carcinoma, atypical  
199 urothelial cells, suspicious for high grade urothelial carcinoma, positive for high grade urothelial  
200 carcinoma)<sup>12</sup>.

201  
202 **Table 1: Patient and Specimen Cohort Characteristics**

|                                                | Overall       |
|------------------------------------------------|---------------|
| Number Specimens                               | 1252          |
| Voided (%)                                     | 1103 (88.1)   |
| Prior History Hematuria (%)                    | 171 (13.7)    |
| Diagnosis (%)                                  |               |
| Negative for High Grade Urothelial Carcinoma   | 810 (64.7)    |
| Atypical Urothelial Cells                      | 296 (23.6)    |
| Suspicious for High Grade Urothelial Carcinoma | 98 (7.8)      |
| Positive for High Grade Urothelial Carcinoma   | 48 (3.8)      |
| Contains Artifact (%)                          | 265 (21.2)    |
| Number Patients                                | 140           |
| Age (mean (SD))                                | 71.19 (12.37) |
| Sex = M (%)                                    | 106 (75.7)    |

203  
204 **Methods Overview**

205 In this section, we summarize improvements introduced in **AutoParis-X**, which will be  
206 elaborated on in following sections. **AutoParis-X** was written using the Python programming  
207 language and neural networks were implemented using the PyTorch and Detectron2 frameworks  
208<sup>50,51</sup>. Statistical and machine learning models were implemented in Python and R<sup>52–54</sup>. A  
209 graphical overview is provided in **Figure 1**:

- 210 1. **Slide processing**– Connected components analysis to isolate individual cells and cell  
211 clusters, sped up through parallel processing <sup>55</sup>.
- 212 2. **Cell border detection (BorderDet)**– Isolates cells within urothelial clusters with  
213 overlapping cytoplasmic borders through neural network detection model <sup>44</sup>.
- 214 3. **Cell-Level Measures:**
- 215 a. **Morphometric measures**– Additional morphological features to improve cell-  
216 type classification and atypia estimation (e.g., size / area).
- 217 b. **Urothelial Classifier (UroNet)**– Used to filter urothelial cells from potentially  
218 conflated cell types through a convolutional neural network, which operates on  
219 images of cells and their morphometric measures <sup>56</sup>– trained on an expanded  
220 dataset with more cell classes.
- 221 c. **NC ratio estimation (UroSeg)**– Estimates the NC ratio by neural network pixel-  
222 wise segmentation of background, nucleus and cytoplasm. Used as objective  
223 marker of atypia.
- 224 d. **Atypia score (AtyNet)**– For predicted urothelial cells at a particular cutoff  
225 threshold, a subjective score which incorporates multiple screening criteria (e.g.,  
226 hyperchromasia, etc.) is determined using another convolutional neural network  
227 which operates on images of cells and their morphometric measures and outputs  
228 an atypia score <sup>48</sup>.
- 229 4. **Cell- and Cluster- Slide-level scores**– Established through a combination of the above  
230 scoring methods, counting the number of cells/clusters in the slide with atypical  
231 morphology / cluster architecture as defined by previous works <sup>43,48</sup>. Optimal decision

232 cutoffs for determining cellular/cluster atypia were decided using Bayesian Optimization  
233 techniques <sup>57</sup>.

234 5. **Classifier development**– Machine learning classifier which integrates cell and cluster  
235 level scores and other demographic/specimen characteristics into an Atypia Burden Score  
236 (ABS), accounting for repeat measures by patient <sup>58–64</sup>.

237 6. **Model interpretation**– A hierarchical logistic regression model was constructed from  
238 the machine learning model to identify important indicators of atypia, in addition to  
239 analogous univariable models. Helpful graphical displays were generated through an  
240 interactive web application <sup>65</sup>.

241 7. **Demo**– A demo was deployed to an Amazon Web Services (AWS) server and software  
242 released through GitHub and PyPI.

243

## 244 **Slide Preprocessing**

245 As detailed in a previous work, individual objects in the image were identified through a  
246 connected component analysis <sup>48</sup>. In brief, WSI were converted into grey scale images using  
247 *opencv2* in Python (version 3.8) <sup>66</sup>. The background of WSIs were converted to white through  
248 intensity thresholding of the grey scale image to form an object mask. Small objects, defined as a  
249 pixelwise area of 50 or below, were filtered using the *remove\_small\_objects* (*scipy*, Python v3.8)  
250 morphological operation <sup>67</sup>. Large objects (e.g., ink markings) were similarly filtered as defined  
251 by a minimal area of 500,000 pixels. After small and large object removal, holes within the  
252 object mask were filled through the *fill\_voids* function (which is faster than offerings from the  
253 *scipy* package) <sup>68</sup>. We leveraged the *cupy* package (Python v3.8) to reduce compute time through  
254 usage of Graphics Processing Units (GPU) where appropriate after extensive timing tests <sup>69</sup>.

255 Subimages of slide objects (e.g., candidate urothelial cells and clusters) were returned using the  
256 *scipy regionprops* function, which also returned various other morphometric measures and  
257 bounding boxes. Inference time and memory usage for the connected component analysis for  
258 object identification was reduced through distributed computing procedures (e.g., *Dask*), which  
259 use optimized parallelization to operate on larger-than-memory arrays. Using multiprocessing  
260 through *dask*, operations were also parallelized across subregions within the slide <sup>55</sup>.

261

### 262 **Cell Border Identification for Cell Cluster Analysis**

263 To improve detection of individual cells within clusters, we previously developed a cell detection  
264 neural network, BorderDet, (using the state-of-the-art Detectron2 framework) to identify: 1)  
265 location of cells through estimation of bounding boxes (one box per cell) and 2) identify cell  
266 boundaries by separating overlapping cytoplasm from adjacent cells . BorderDet was developed  
267 using cell clusters identified from the *cluster-level training cohort*. In brief, two cytopathologists  
268 (LJV and XL) annotated 800 cell cytoplasmic boundaries for squamous cells, inflammatory cells,  
269 negative/atypical urothelial cells, and dense regions of overlapping/indistinguishable cell borders  
270 (*dense region*). BorderDet is an object detection neural network that can detect multiple  
271 objects/instances (i.e., cells) in a cell cluster image <sup>44</sup>. It looks for areas in the image that may  
272 contain an object and then assigns a score that indicates how likely it is that the region contains  
273 an object. The program labels identified objects with the appropriate label (e.g., squamous cell,  
274 dense region) and draws a line around the edges of the object (i.e., segmentation mask) to portray  
275 the exact boundary, which can overlap with adjacent cells. This allows the program to accurately  
276 identify and locate multiple objects in a single cluster. Objects were then filtered using non-max

277 suppression, a technique which ranks overlapping objects, as defined through their intersection  
278 over union (IoU), based on their “objectness” score and removes objects with a lower score <sup>70</sup>.

279  
280 To reduce the number of objects assessed using BorderDet, a size filter was enforced, assessing  
281 candidate cell clusters with a pixelwise area of at least 1800 pixels, determined through a  
282 sensitivity analysis and visual inspection. Parallel processing through multithreading and  
283 multiprocessing was integrated using *dask* for rapid evaluation <sup>55</sup>. Individual cells extracted  
284 through the connected component analysis (area between 256 and 1800 pixels) and objects  
285 extracted from clusters using their instance segmentation masks were further assessed using  
286 single-cell algorithms which report quantitative metrics of atypia (**cell-level measures**).

287  
288 In comparison to the density-based clustering approach that validated urothelial clusters using a  
289 CNN (Sanghvi et al.), which could lead to many false negative findings (i.e., approach only  
290 “screens out” candidate cell clusters), urothelial cell clusters were identified by BorderDet if they  
291 contained urothelial cells <sup>43</sup>. This approach improves on watershedding (AutoParis v1) and  
292 density-clustering (Sanghvi et al.) techniques as these two methods do not precisely identify cells  
293 within larger candidate clusters <sup>20,43,44,48</sup>. BorderDet also improves upon previous methods by  
294 locating dense urothelial cell architectures with overlapping indistinguishable cytoplasmic  
295 borders which are challenging to assess for individual cells. Furthermore, while presence of a  
296 dense architectural region in a cluster as defined by an area cutoff was used as an atypia  
297 predictor, dense architectures themselves were further subclassified as atypical if surrounding  
298 urothelial cells were labeled as atypical (as defined by morphology).

299

## 300 **Cellular Morphometric Measures**

301 Various morphometric features were estimated from individual candidate cells, including: 1)  
302 area; 2) convex area; 3) eccentricity; 4) equivalent diameter; 5) extent; 6) Feret's diameter; 7)  
303 maximum diameter; 8) filled area; 9) major axis length; 10) minor axis length; 11) perimeter;  
304 and 12) solidity, extracted using *scikit-image* (Python v3.8) <sup>56,71</sup>. These morphometric features  
305 were primarily used to help demarcate urothelial cells. As an example, urothelial cells are  
306 significantly larger than leukocytes, so cell area is an important criterion for separating the two  
307 cell types. Morphometric features were standardized using quantile transformation (implemented  
308 in *scikit-learn*, Python v3.8) within the training set to reduce the influence of any given cell on  
309 specifically which morphometric features were important for the assessment <sup>72</sup>. This places  
310 greater emphasis on the imaging findings as means to delineate between different cell types.

311

## 312 **Urothelial Cell Classification**

313 Urothelial cell classification was accomplished using UroNet, which was modified significantly  
314 from its original incarnation. While AutoParis estimated both the presence and atypia of the  
315 urothelial cell simultaneously <sup>48</sup>, as differentiated from several other specimen constituents,  
316 AutoParis-X is chiefly focused on delineating urothelial cells from potentially conflated cell  
317 types and slide objects prior to estimating atypia. When aiming to validate the AutoParis  
318 algorithm, we noticed that a nontrivial number of urothelial cells lacked a nucleus, potentially  
319 related to being out of focus (no Z-stacking) <sup>73</sup>, but were not included in our original training set  
320 and thus were often confused with other cell types with a smaller nuclear area (e.g., squamous  
321 cells). We also identified rare urothelial cells with changes consistent with a Polyomavirus

322 cytopathic effect<sup>49,74</sup>. These cells are benign but assessment can often mimic HGUC and would  
323 certainly mislead any attempt to accurately predict the NC ratio and are thus removed by UroNet.

324

325 A total of 108,388 and 27,097 cells were manually labeled by two cytopathologists (LJV and XL)  
326 and used to train and validate the cell level model respectively from the *cell-level training and*  
327 *validation cohort*. A breakdown of cell types present in this training and validation cohort is listed  
328 in **Table 2**. These cell images were combined into the following classes: 1) urothelial cells  
329 (benign/atypical), 2) urothelial cells with polyomavirus cytopathic effect, 3) debris, crystals and  
330 red blood cells (RBC), 4) leukocytes, 5) clusters of leukocytes, and 6) squamous cells. UroNet was  
331 developed using a residual neural network (ResNet18), augmented with an auxiliary layer which  
332 combines the morphometric information (e.g., area/size, eccentricity, etc.) with features extracted  
333 from ResNet18 by fusing the penultimate layer of the network with this information. The auxiliary  
334 neural network first maps the number of morphometric features,  $\vec{x}_M$ , to the number of ResNet18  
335 features using a multi-layer perceptron,  $f_\phi$ . Then the morphometric information (same  
336 dimensionality as the ResNet features) is fused with the deep learning features using a gated  
337 attention operation, which decides dynamically on a cell-by-cell basis which set of features (deep  
338 learning,  $\vec{z}_{DL}$ , vs morphometric,  $\vec{z}_M$ ) to weight more. The weight is dynamically determined using  
339 the gating neural network,  $f_\theta$ <sup>75</sup>.

340

341

342

343

344

345

346

$$\begin{aligned} \vec{z}^j &= \alpha_{DL} \vec{z}_{DL} + \alpha_M \vec{z}_M \\ \alpha_{DL} &= \frac{\exp(a_{DL})}{\exp(a_{DL}) + \exp(a_M)} ; \alpha_M = \frac{\exp(a_M)}{\exp(a_{DL}) + \exp(a_M)} \\ a_{DL} &= f_\theta(\vec{z}_{DL}); a_M = f_\theta(\vec{z}_M) \\ \vec{z}_M &= f_\phi(\vec{x}_M) \end{aligned}$$

This operation permits UroNet to filter out cells with significant size differences (e.g., leukocytes are much smaller than urothelial cells). After model training using the *PathflowAI* package<sup>76</sup>, the

347 performance of UroNet was assessed using the *cell-level validation set* through the area under the  
348 receiver operating characteristic curve (AUC), reported for each class. To assess how much weight  
349 was placed on the morphometric features for prediction, we investigated the attention weights,  $\alpha$ ,  
350 across the validation set. We used Integrated Gradients<sup>77,78</sup>, a deep learning interpretation method,  
351 to assess which specific image/deep learning and morphometric features were important for each  
352 cell type.

353

354 **Table 2: Number of cell types used to train/validate UroNet and AtyNet**

|                   | Benign<br>Urothelial<br>Cells | Atypical<br>Urothelial<br>Cells | Polyomavirus<br>Infected Cells | RBC   | Crystals | Debris | Leukocyte | Leukocyte<br>Cluster | Squamous<br>Cells |
|-------------------|-------------------------------|---------------------------------|--------------------------------|-------|----------|--------|-----------|----------------------|-------------------|
| <b>Training</b>   | 3522                          | 3795                            | 3606                           | 11199 | 220      | 63317  | 8037      | 3425                 | 11267             |
| <b>Validation</b> | 880                           | 949                             | 901                            | 2800  | 55       | 15830  | 2009      | 856                  | 2817              |

355

356

### 357 **NC Ratio Estimation**

358 For cells classified as urothelial, the NC ratio was calculated for both *isolated* and *cluster cells*  
359 using a segmentation neural network, UroSeg, which employed a U-Net architecture to assign on  
360 a pixelwise basis the presence of nucleus, cytoplasm, or background<sup>48,79,80</sup>. These areas were  
361 annotated/outlined by cytopathologists and UroSeg was trained and validated on 3,690 and 1,231  
362 urothelial cells respectively. Performance was reported using the area under the receiver  
363 operating characteristic curve (AUC), reported on a pixelwise basis. For select cell clusters, we  
364 compared the impact of running BorderDet, followed by UroNet and UroSeg to calculate the NC  
365 ratio as compared to running UroSeg then watershedding, as was originally done by the previous  
366 AutoParis algorithm.

367

### 368 **Atypia Score**



369 Several cytopathologists determined whether every urothelial cell extracted from the *cell-level*  
370 *training and validation cohort* (Table 2) was benign or atypical, based on existing markers of  
371 atypia (e.g., presence of nuclear membrane irregularity, abnormal chromatin, hyperchromasia,  
372 etc.). From this information, AtyNet, a CNN based on ResNet18 with a similar architecture as  
373 UroNet, was trained to recapitulate these subjective findings<sup>81</sup>. For every urothelial cell, AtyNet  
374 calculates a subjective marker of atypia– the *atypia score*– which is a value from 0-1 that reflects  
375 the probability that a cell is atypical. We used IntegratedGradients, a deep learning interpretation  
376 method, to assess which specific image/deep learning and morphometric features were important  
377 for atypia assignment.

378

### 379 **Calculation of Cell and Cluster Slide-Level Scores**

380 All extracted individual cell and cluster level statistics are placed into Rich Information Frames  
381 (RIF), which are data frame/tabular data structures<sup>48</sup>. For any given WSI, there are three RIFs  
382 (see **Table 3** for description of features):

- 383 1. *Isolated-Cell-RIF*: Stores morphometric measures; bounding box locations within  
384 specimens, cell type assignment probabilities; NC ratios; and atypia scores for each cell  
385 not associated with clusters (*isolated urothelial cells*).
- 386 2. *Cluster-Cell-RIF*: Stores morphometric measures; bounding box locations within  
387 specimens; cell type assignment probabilities; NC ratios; and atypia scores for each cell  
388 associated with clusters, in addition to their cluster assignment label (*cluster urothelial*  
389 *cells*).
- 390 3. *Cluster-RIF*: Stores bounding box locations within WSI; cluster size; cytoplasmic  
391 borders; area of dense regions in cluster; and associated cluster label/identifier.

392 Information on cellular atypia (e.g., number of atypical cells), number of urothelial cells,  
393 amongst other cluster-level measures, were added to this *RIF* from the *Cluster-Cell-RIFs*.

394  
395 All *RIFs* are cross-tabulated to form a Slide Inference Frame (*SIF*), which represents slide-level  
396 statistics, aggregated across all urothelial cells and urothelial cell clusters. This is accomplished  
397 by thresholding the cutoff probabilities for the cell and cluster-level scores and counting the  
398 number of cells and clusters which meet these criteria. For instance, given an atypia score cutoff  
399 of 0.7 (i.e., cell is atypical if AtyNet assigns a 70% probability), a cluster is deemed to exhibit  
400 cellular atypia if, for instance, more than 20% of the cells within the cluster are atypical under  
401 this definition. Based on the definition of a urothelial cluster (e.g., number of urothelial cells),  
402 the number of atypical clusters within the WSI can be estimated. All urothelial cells with an NC  
403 ratio of 0 were removed prior to calculating these scores. *SIF* contains the following statistics:

- 404 1. Isolated cell subscores: Derived from *Isolated-Cell-RIF*, for cells which were *not*  
405 *associated with clusters*, including the following statistics: 1) number of urothelial cells;  
406 2) number of atypical urothelial cells as determined using the atypia score; 3) number of  
407 atypical urothelial cells as determined using the NC ratio; 4) number of urothelial cells;  
408 and 5) center and spread of various morphometric measures.
- 409 2. Cluster cell subscores: Derived from *Cluster-Cell-RIF*. Similar to isolated cell subscores,  
410 only considering cells which were associated with / *identified within clusters*.
- 411 3. All cell subscores: Combines isolated and cluster cell subscores, considering all cells,  
412 irrespective of whether there was a cluster assignment.
- 413 4. Cluster subscores, representing aggregate *Cluster-RIF* statistics, including: 1) number of  
414 urothelial clusters (defined by a minimum threshold of urothelial cells); 2) number of

415 atypical urothelial clusters (defined by either NC ratio or *atypia* score); 3) number of  
 416 dense clusters; and 4) number urothelial clusters that are both atypical and dense. Unlike  
 417 the previous three scores which focus on individual urothelial cells, identified urothelial  
 418 cell clusters represent the principal unit of analysis.

419  
 420 Using AutoParis-X, *RIF-SIF* scores were calculated across the *slide-level training and*  
 421 *validation cohorts*. We added the following patient-level characteristics to the *RIF-SIF* scores: 1)  
 422 age; 2) sex; 3) history of hematuria; and 4) specimen source<sup>82,83</sup>. We also noted where slides  
 423 contained significant blood, high cellularity, acellularity, neobladders (abundant degenerated  
 424 enterocytes) and scanning artifacts.

425

426 **Table 3: Cell/Cluster/Slide-Level Features and their descriptions**

| Level   | Predictor                                       | Algorithm                      | Description                                                                                                                                                                                                                                                                                           |
|---------|-------------------------------------------------|--------------------------------|-------------------------------------------------------------------------------------------------------------------------------------------------------------------------------------------------------------------------------------------------------------------------------------------------------|
| Cell    | Urothelial cell score                           | UroNet                         | Predicted probability of urothelial cell from convolutional neural network, used to dynamically isolate urothelial cells in specimen                                                                                                                                                                  |
|         | Atypia score                                    | AtyNet                         | Predicted probability of presence of atypical features in urothelial cell (e.g., hyperchromasia, irregular nuclear membrane, etc.), determined using convolutional neural network                                                                                                                     |
|         | NC Ratio                                        | UroSeg                         | Nuclear to cytoplasm area ratio derived from pixelwise segmentation of nucleus and cytoplasm using segmentation neural network                                                                                                                                                                        |
|         | Morphometric measures                           | Custom                         | Complements binning of urothelial cells and assignment of atypia score, features: 1) area; 2) convex area; 3) eccentricity; 4) equivalent diameter; 5) extent; 6) Feret's diameter; 7) maximum diameter; 8) filled area; 9) major axis length; 10) minor axis length; 11) perimeter; and 12) solidity |
| Cluster | Dense Area                                      | BorderDet                      | Whether cluster contains dense architecture of overlapping and indistinguishable cytoplasmic borders                                                                                                                                                                                                  |
|         | Number urothelial cells                         | BorderDet/UroNet               | Whether cluster contained urothelial cells, determined by counting cells with high urothelial cell score                                                                                                                                                                                              |
|         | Number atypical urothelial cells (atypia score) | BorderDet/UroNet/AtyNet        | Whether cluster contained abnormal urothelial cells, determined by counting cells with high atypia score                                                                                                                                                                                              |
|         | Number atypical urothelial cells (NC ratio)     | BorderDet/UroNet/UroSeg        | Whether cluster contained abnormal urothelial cells, determined by counting cells with high NC ratio                                                                                                                                                                                                  |
|         | Dense & Atypical                                | BorderDet/UroNet/AtyNet/UroSeg | Whether cluster contained both dense architecture and atypical cellular features                                                                                                                                                                                                                      |
| Slide   | Patient characteristics                         | Supplied                       | Includes age, sex, history of hematuria, specimen source (e.g., voided), presence of specimen artifact                                                                                                                                                                                                |
|         | Isolated Cell-SIF Scores                        | Bayesian Optimization          | Counting the number of cells with the following features from cells not associated with clusters: 1) cellularity (urothelial score), 2) atypia (atypia score), 3) atypia (NC ratio), 4) other morphometric measures                                                                                   |

|                         |                                |                                                                                                                                                                                                                                   |
|-------------------------|--------------------------------|-----------------------------------------------------------------------------------------------------------------------------------------------------------------------------------------------------------------------------------|
| Cluster Cell-SIF Scores | Bayesian Optimization          | Counting the number of cells with the following features from cells associated with clusters: 1) cellularity (urothelial score), 2) atypia (atypia score), 3) atypia (NC ratio), 4) other morphometric measures                   |
| All Cell-SIF Scores     | Bayesian Optimization          | Combines Isolated Cell-SIF Scores and Cluster Cell-SIF Scores                                                                                                                                                                     |
| Cluster-SIF             | Bayesian Optimization          | Counting the number of clusters with the following features: 1) number of urothelial clusters, 2) atypical urothelial clusters (atypia score), 3) atypical clusters (NC ratio), 4) dense clusters, 5) dense and atypical clusters |
| Atypia Burden Score     | Mixed effects machine learning | Integrates all slide-level predictors using machine learning model to calculate a score between 0-1 reflecting overall specimen atypia, correlated with UC diagnostic category                                                    |

427

## 428 **Estimating Specimen Atypia with Machine Learning**

429 Specimen atypia was reported through dichotomization of TPS categories into the following  
430 classes: 1) negative, atypical and 2) suspicious, positive. The *Atypia Burden Score* (ABS) reflects  
431 the predicted probability of a specimen being atypical as assessed by AutoParis-X. We  
432 implemented several machine learning and statistical modeling approaches to predict specimen  
433 atypia, including: 1) generalized linear mixed effects modeling (hierarchical logistic regression;  
434 GLMM; *brms* package, R v4.1), accounting for patient- and pathologist-level random intercepts,  
435 2) Random Forest, which does not account for clustering by patient, 3) Gaussian Process Tree  
436 Boosting (GPBoost), and 4) Bayesian Additive Regression Trees (BART)<sup>58–61,64</sup>. GPBoost and  
437 BART account for clustering by patient by fitting patient- and pathologist-level random  
438 intercepts while capturing interactions and nonlinear associations between *SIF* predictors using  
439 ensemble tree models,  $f_{\theta}(\vec{x})$ :

$$\begin{aligned}
 440 \quad & y_i \sim \text{Binomial}(1, p_i) \\
 441 \quad & \text{logit}(p_i) = \beta_0 + f_{\theta}(\vec{x}) + \beta_1 \text{age}_i + \beta_2 \text{sex}_i + \beta_3 \text{hematuria}_i + b_{\text{patient}[i]} + b_{\text{pathologist}[i]} \\
 442 \quad & b_{\text{patient}[i]} \sim N(0, \tau_1^2) \\
 443 \quad & b_{\text{pathologist}[i]} \sim N(0, \tau_2^2) \\
 444 \quad & \beta \sim N(0, \nu^2)
 \end{aligned}$$

445

446 Overall model performance was communicated using fivefold cross-validation, which randomly  
447 partitions the data into a training and validation set and reports the overall performance (using  
448 the AUC) over the validation folds. Specimens belonging to the same patient were partitioned

449 into the same training/validation fold for each cross-validation split to avoid potential inflation of  
450 test statistics. Confidence intervals (CI) were reported using 1000-sample nonparametric  
451 bootstrapping of each fold to yield 1000 samples of cross-validation statistics. Cell and cluster-  
452 level thresholds (e.g., atypical cell if  $NC > 0.7$ ; atypical cluster if at least 3 urothelial cells are  
453 atypical), which are used to generate *RIF-SIF* scores, were optimally aligned with specimen  
454 atypia through a Bayesian Optimization routine<sup>57</sup>.

455

## 456 **Interpretation**

457 We identified significant *ABS* predictors by extracting salient interactions from the tree ensemble  
458 models and reporting odds ratios (OR) from univariable and multivariable Bayesian GLMM  
459 models:  $\text{logit}(p_i) = \vec{\beta} \cdot \vec{x} + b_{\text{patient}[i]} + b_{\text{pathologist}[i]}$ . As many of the *ABS* predictors were  
460 highly multicollinear, variance inflation factors and horseshoe lasso priors were used to select  
461 predictors<sup>84,85</sup>. Univariable associations adjusting for age, sex and hematuria were reported to  
462 give credence to omitted collinear predictors in the multivariable statistical modeling.

463 Hierarchical Bayesian cumulative link models (i.e., ordinal regression) in a similar specification  
464 were also used to report associations between the predictors and specimen atypia, treating the  
465 urine cytology assignment as an ordinal variable<sup>86,87</sup>. Statistical significance was reported using  
466 the p-value, as derived from the probability of direction (*pd*):  $p \approx 2 * (1 - pd)$ . A p-value less  
467 than 0.05 indicates a significant atypia predictor. Credible intervals, similar to confidence  
468 intervals, communicated uncertainty in the effect estimates.

469

## 470 **Web Application and Software Availability**

471 We also developed an interactive web application which allows for rapid assessment of cytology  
472 slides. In brief, users first select a slide to examine. An *ABS* score is returned for the specimen as  
473 assessed using AutoParis-X. The *Cell-RIF* is converted into a 2D scatter plot of the NC ratio and  
474 atypia score— each point represents a cell. Using a “lasso tool”, users select cells within this  
475 scatterplot. The urothelial cells are highlighted on a zoomable WSI viewer (*openseadragon*) and  
476 additionally made available through an image gallery for additional examination (**Figure 2**)<sup>88</sup>.  
477 The WSI viewer will highlight cells based on their relative degree of atypia as assessed  
478 algorithmically, focusing the end-user on a small subset of potentially malignant cells. A demo  
479 of this interactive web application can be found at the following URL:  
480 <http://edit.autoparis.demo.levylab.host.dartmouth.edu/> (**user:** edit\_user, **password:** qdp\_2022;  
481 full-screen display is encouraged for optimal viewing experience). The web application also  
482 features a tutorial video for operating the application. The AutoParis-X software is also open-  
483 source, available to download on GitHub (<https://github.com/jlevy44/AutoParisX>) and installable  
484 using the following PyPI package: *autoparis*. Users aiming to run AutoParis-X will need to train  
485 compatible neural networks as neural networks were only trained on data from a single  
486 institution and would need additional finetuning to generalize.

## AUTOPARIS-X WEB APPLICATION DEMO

Instructions:

1. Select patient to return atypical burden score.
2. Select urothelial cells using cutoff probability.
3. Select malignant cells using lasso tool.
4. Click 'Toggle Annotations', inspect via WSI/table.

Select Patient: **A** Atypical Burden Score:

Patient 4, Positive x 0.76

Select Urothelial Threshold (0-1): **B**

Select Malignant Cells: **C**

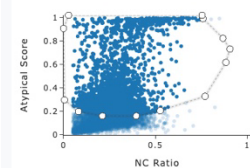

Emphasis on malignant cells?: **More Info**

NO SCALING  NC RATIO  ATYPYA SCORE  UROTHELIAL SCORE

**D**

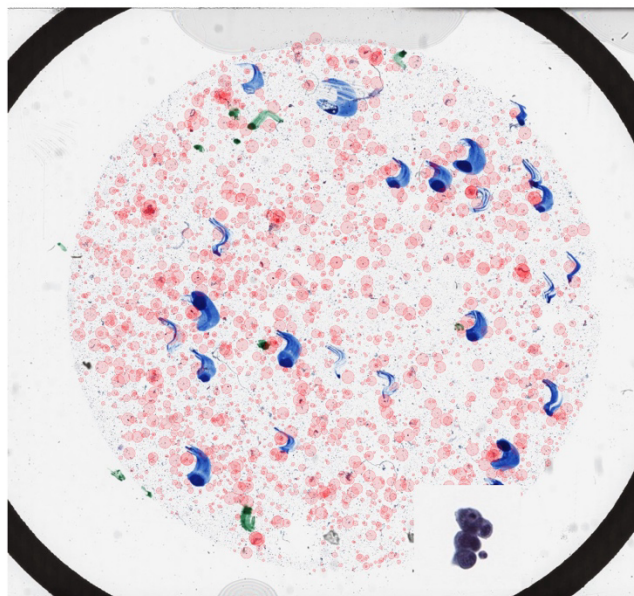

## VIEW MALIGNANT CELL TABLE

Sort table on: **More Info**

NO SORT  NC RATIO  ATYPYA SCORE

Max number cells in table:

50 75 100 125 150 175 200

| IMAGE | NC RATIO | ATYPYA |
|-------|----------|--------|
|       | 0.687    | 0.992  |
|       | 0.29     | 0.989  |
|       | 0.193    | 0.985  |
|       | 0.398    | 0.97   |
|       | 0.259    | 0.965  |
|       | 0.107    | 0.939  |
|       | 0.34     | 0.926  |
|       | 0.477    | 0.906  |
|       | 0.265    | 0.902  |
|       | 0.356    | 0.873  |
|       | 0.41     | 0.864  |
|       | 0.355    | 0.817  |
|       | 0.399    | 0.769  |
|       | 0.385    | 0.629  |
|       | 0.371    | 0.602  |
|       | 0.167    | 0.543  |
|       | 0.248    | 0.505  |
|       | 0.276    | 0.426  |
|       | 0.284    | 0.412  |
|       | 0.106    | 0.36   |
|       | 0.246    | 0.358  |

**E**

487  
488 **Figure 2: AutoParis-X Web Application:** A) Cytopathologist selects patient/specimen scanned  
489 and processed the previous day, which outputs Atypia Burden Score; B) Urothelial cells are  
490 identified based on a cutoff probability selected by the user; C) Individual cells are plotted using  
491 scatter plot, which depicts each cell's NC ratio and atypia score; user selects most atypical cells  
492 for viewing via the WSI viewer and gallery using the "Lasso" tool; D) WSI viewer– red points  
493 are sized by degree of atypia and identify important urothelial cells to assess/zoom in; E) gallery  
494 view enables rapid examination of individual cells, sorting them by their degree of atypia  
495

## 496 Results

### 497 Performance of UroNet

498 UroNet demonstrated remarkable performance in the task of delineating among 6 different  
499 classes of cell types / objects to determine which cells are urothelial (**Figure 2; Table 4**). **Figure**  
500 **3A** demonstrates a nearly perfect ROC curve (AUC=0.997 macro-averaged) for all 6 cell types  
501 across the validation set, indicating high classification accuracy. In addition, raw imaging  
502 features interpreted using IntegratedGradients corroborated with known histomorphology for  
503 specific cell types (e.g., highlighting dense chromatin to depict urothelial cells, surrounding  
504 membrane for squamous cells, etc.; **Figure 3B**). Many morphometric features were found to be  
505 important– for instance: 1) eccentricity as a defining feature of urothelial cells versus other cell

506 types, 2) solidity for RBCs, 3) convex area as an important predictor for leukocyte clusters which  
 507 have highly irregular formations, and 4) both convex area and solidity for squamous cells, which  
 508 are larger than the other cell types and typically solid shapes without any notable deformations  
 509 (Supplementary Figure 1). These findings suggest that UroNet can accurately identifying  
 510 urothelial cells, important for establishing assessment of urothelial cells as the basis for  
 511 AutoParis-X's automated assessment.  
 512

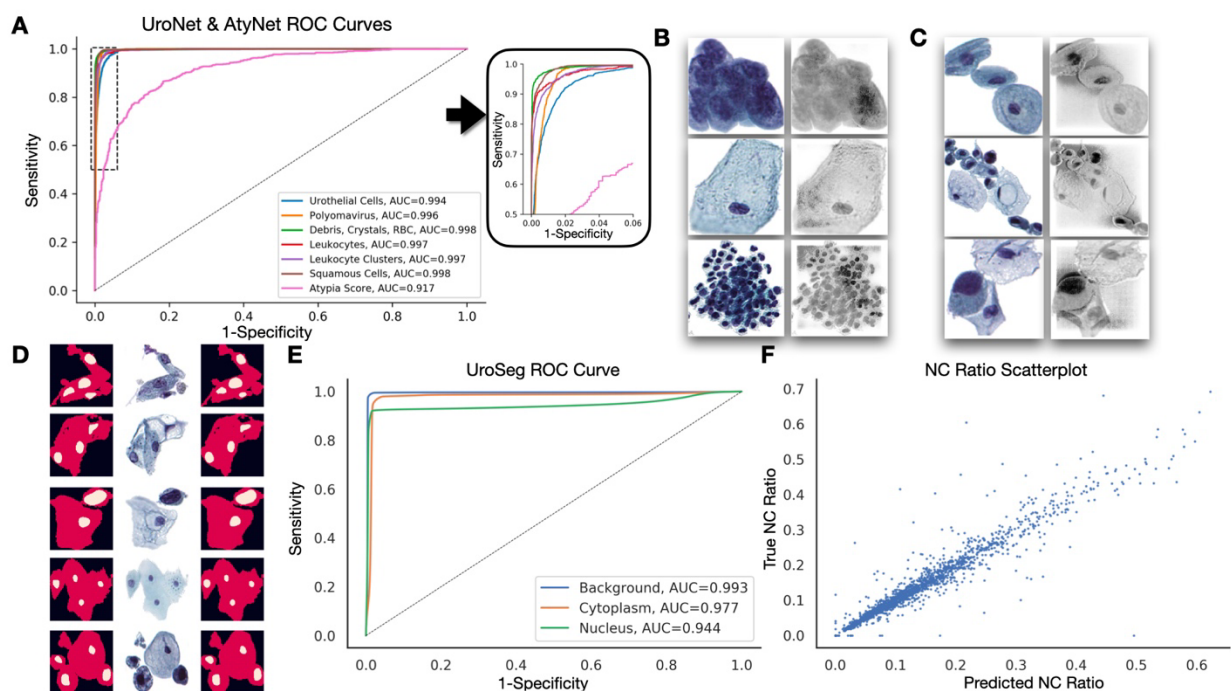

513 **Figure 3: Performance of UroNet/UroSeg/AtyNet:** **A)** Receiver operating characteristic curves  
 514 for each cell type from the internal validation set (UroNet) and for delineating atypical versus  
 515 benign urothelial cells (AtyNet); **B)** Integrated Gradients heatmap localizing important features  
 516 identified using UroNet for urothelial cells, squamous cells and leukocyte clusters; **C)** Integrated  
 517 Gradients heatmap localizing important features identified using AtyNet for one benign  
 518 urothelial cell / cell cluster, followed by two atypical cell images; **D)** Example ground truth  
 519 segmentation masks (left; background- black, cytoplasm- red, nucleus- yellow), original images  
 520 (center) and segmentation masks predicted using UroSeg (right); **E)** Receiver operating  
 521 characteristic curves for background, cytoplasm and nucleus (pixelwise assessments) from the  
 522 internal validation set (UroSeg); **F)** Ground truth versus UroSeg predicted NC ratios, derived  
 523 from the segmentation results  
 524  
 525



526 **Table 4: Performance Statistics for UroNet, UroSeg, and AtyNet; 95% confidence intervals**  
 527 **estimated using 1000-sample non-parametric bootstrapping**

| Algorithm | Quantity                  | Measure             | Estimate | 2.5% CI | 97.5% CI |
|-----------|---------------------------|---------------------|----------|---------|----------|
| UroNet    | Urothelial                | AUC                 | 0.994    | 0.993   | 0.995    |
|           | Polyomavirus              | AUC                 | 0.996    | 0.995   | 0.996    |
|           | Debris,<br>Crystals, RBCs | AUC                 | 0.998    | 0.998   | 0.998    |
|           | Leukocytes                | AUC                 | 0.997    | 0.996   | 0.998    |
|           | Leukocyte<br>Clusters     | AUC                 | 0.997    | 0.996   | 0.997    |
|           | Squamous Cells            | AUC                 | 0.998    | 0.998   | 0.999    |
| AtyNet    | Atypia Score              | AUC                 | 0.917    | 0.905   | 0.929    |
| UroSeg    | Background                | AUC                 | 0.993    | 0.993   | 0.993    |
|           | Cytoplasm                 | AUC                 | 0.977    | 0.977   | 0.977    |
|           | Nucleus                   | AUC                 | 0.944    | 0.944   | 0.944    |
|           | NC Ratio                  | Spearman            | 0.965    | 0.954   | 0.973    |
|           |                           | Mean Absolute Error | 0.015    | 0.014   | 0.017    |

528  
529

530 **Performance of UroSeg**

531 UroSeg, a neural network segmentation tool, demonstrated excellent performance on our internal  
 532 validation set in predicting the pixelwise presence of the nucleus and cytoplasm (AUC=0.971  
 533 macro-averaged) in order to calculate nuclear to cytoplasm (NC) ratio (**Figures 2-3; Table 4**).  
 534 **Figure 3F** also shows nearly perfect receiver operating characteristic curves for both the nucleus  
 535 and cytoplasm, indicating the high accuracy of UroSeg in predicting these structures.  
 536 Additionally, we found that the NC ratios calculated from the segmentation masks produced by  
 537 UroSeg correlated nearly perfectly with the ground truth NC ratios ( $r=0.965$ ;  $MAE=0.015$ )  
 538 annotated by the cytopathologists (**Figure 3G**). **Figure 3E** demonstrates the alignment of the  
 539 true and predicted nuclear and cytoplasmic segmentation masks, further highlighting the  
 540 accuracy of UroSeg.

541

542 UroSeg was similarly effective when used in conjunction with BorderDet, our previously  
543 established urothelial cluster border separation tool. Cells extracted from urothelial clusters using  
544 BorderDet and confirmed to be urothelial via UroNet were assessed using UroSeg. We compared  
545 the NC ratios, averaged across each urothelial cluster, in our internal validation set with what  
546 was accomplished using watershedding techniques (which divided the clusters after seeding the  
547 watershed based on the location of the nuclei). Watershedding was not sensitive to the cell type  
548 as it did not leverage BorderDet and UroNet. In addition, for clusters containing urothelial cells  
549 and background debris or other confounding cell types, watershed heavily underestimated the  
550 NC ratio (**Figure 4**). This was universal across all of the urothelial clusters in the internal  
551 validation set. Through visual examination, it is clear that by precisely demarcating cytoplasmic  
552 borders between immediately adjacent and overlapping cells, BorderDet and UroNet allow for  
553 precise estimation of the NC ratio. Opting for alternative assessment approaches (e.g.,  
554 watershedding) could reduce the predictive capacity of slides containing abundance of urothelial  
555 cell clusters by removing or unnecessarily skewing the reported statistics for these cells as  
556 compared to isolated cells.

557  
558

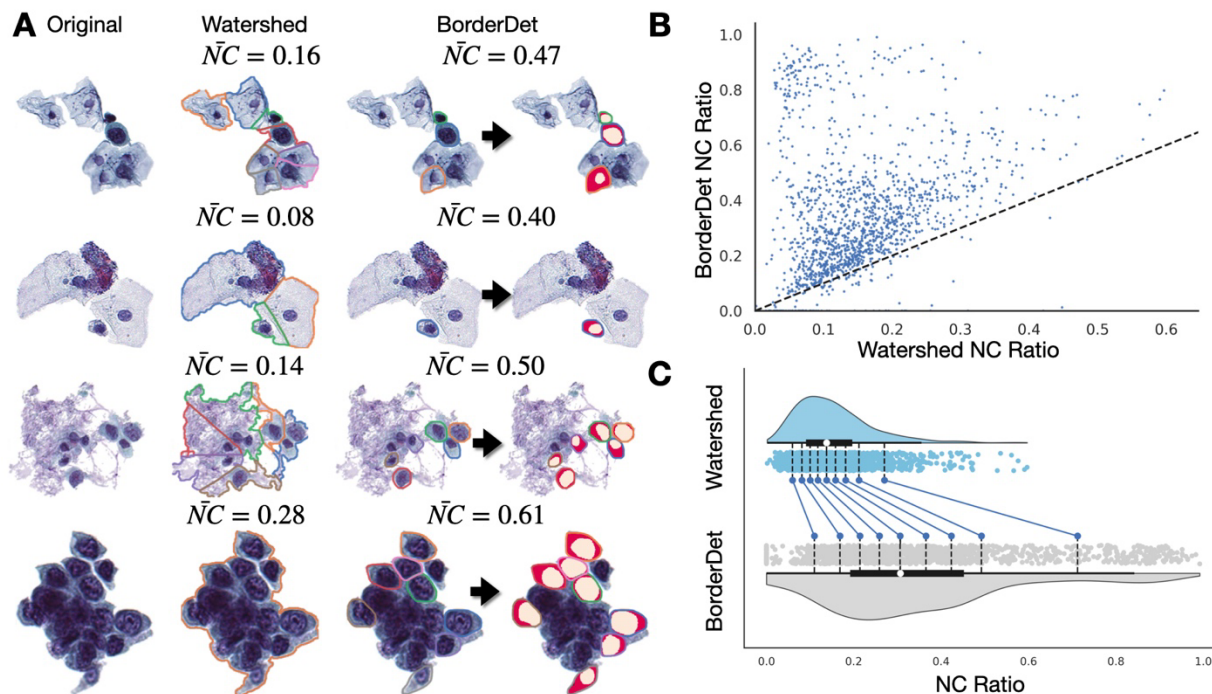

559  
 560 **Figure 4: Performance of BorderDet and UroSeg on estimating NC ratios for cells in**  
 561 **clusters: A)** Estimates derived using watershedding underestimate the NC ratio, whereas  
 562 detecting the urothelial cytoplasmic borders then using UroSeg (segmentation masks plotted over  
 563 detected urothelial cells) to estimate the NC ratio leads to a higher and more accurate NC ratio;  
 564 final cluster contains dense region of significantly overlapping and indistinguishable cytoplasmic  
 565 borders, dense area used as a predictor for AutoParis-X; **B)** Scatterplot comparing watershed-  
 566 derived and BorderDet derived NC ratios; **C)** Shift plot indicating BorderDet NC ratios are  
 567 higher than that achieved using watershedding

568  
 569 **Performance of AtyNet**

570 Performance for AtyNet, the neural network which provides an atypia score estimate for each  
 571 urothelial cell, was equally promising (**Figure 2; Table 4**). The algorithm achieved an area under  
 572 the receiver operating characteristic curve of 0.917 on the internal validation set, indicating a  
 573 strong ability to distinguish between atypical and normal cells. Model interpretation using  
 574 integrated gradients revealed that the algorithm placed a high emphasis on irregularities in the  
 575 nuclear membrane as a key feature in determining cytological atypia (**Figure 2B**)<sup>56</sup>.

576  
 577 **ABS Classifier Performance**

578 Individual cell and cluster level features were cross tabulated across the slide and assessed using  
579 multiple statistical and machine learning algorithms. Many cellular and cluster level features  
580 correlated closely with specimen atypia (**Supplementary Figures 2-4**). Atypical urothelial cells  
581 as defined by both the NC ratio and atypia score, which were contained within clusters were, in  
582 some cases, more predictive of specimen atypia than assessment of isolated cells alone (e.g.,  
583 cells with high NC ratio in clusters were more predictive than isolated cells with high NC ratio),  
584 further suggesting the importance of employing BorderDet for separating cells. The number of  
585 urothelial cells and cell clusters correlated directly with potential for malignancy. Urothelial cell  
586 clusters which were both atypical and contained dense regions were the third most predictive  
587 variable when assessed using univariable regression.

588  
589 As part of the AutoParis-X framework, each machine learning model outputs the Atypia Burden  
590 Score (ABS)— the probability of assigning suspicious or positive UC exam as judged using  
591 AutoParis-X. Across all algorithms, ABS correlated closely with specimen atypia. The machine  
592 learning models which accounted for patient and pathologist-level variation, GPBoost and  
593 BART, outperformed all other approaches with AUCs of 0.89 and 0.88 respectively (**Figure 5A**;  
594 **Table 5**). The generalized linear mixed effects models also performed well. Across all models,  
595 ABS scores preserved the ordering of the UC categories  
596 (Negative<Atypical<Suspicious<Positive; **Figure 5B**). We fit an ordinal regression model to this  
597 data, which demonstrated a strong positive association with atypia (UC categories;  $\beta =$   
598 3.61; 95%CI: [3.12 – 4.11];  $p < 0.0001$ ). This information is corroborated by density heatmaps  
599 depicting the NC Ratio and Atypia score for individual urothelial cells across the entire cohort,  
600 after being filtered using UroNet. This yielded more than 6 million cells, which were separated

601 based on their UC class. **Figure 5D** demonstrates the progression in cellular atypia across the  
 602 categories—negative cases typically do not contain cells that have both high NC ratio and atypia,  
 603 while these cells can be increasingly found at higher UC categories. Positive cases contain many  
 604 cells that are both highly atypical with high NC ratio.  
 605

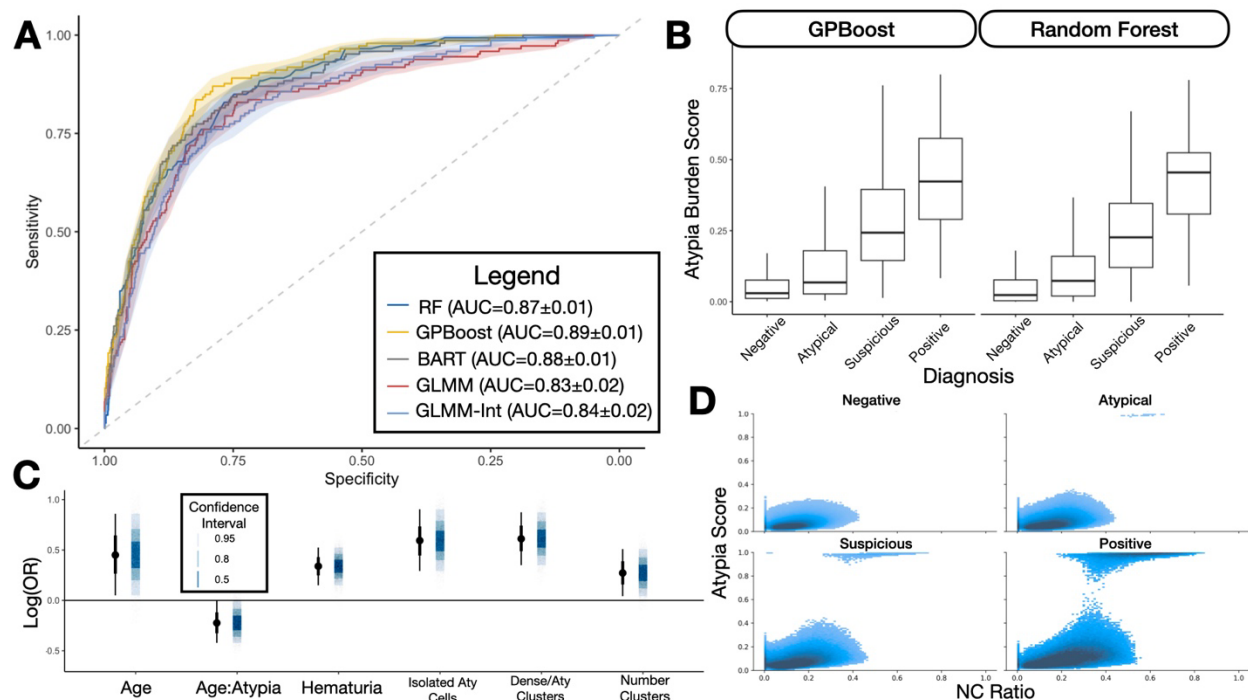

606 **Figure 5: ABS Classifier Performance:** **A)** Receiver operating characteristic curves illustrating  
 607 performance of ABS classifiers; **B)** Boxplot of raw ABS scores predicted by GPBoost and  
 608 Random Forest by UC class; **C)** Point estimates and 95% credible intervals for predictors  
 609 uncovered from final multivariable Bayesian hierarchical model; **D)** Density plot of NC Ratios  
 610 and Atypia scores cross tabulated across over 6 million cells from the retrospective cohort,  
 611 divided by UC classes, demonstrating progression of cells to take on higher NC ratios and Atypia  
 612 scores at higher UC classes  
 613

614  
 615 **Table 5: Performance statistics for ABS Classifiers;** 95% confidence intervals estimated using  
 616 1000-sample non-parametric bootstrapping

|                  | AUC   | 2.5% CI | 97.5% CI |
|------------------|-------|---------|----------|
| <b>RF</b>        | 0.873 | 0.846   | 0.897    |
| <b>GPBoost</b>   | 0.889 | 0.866   | 0.913    |
| <b>BART</b>      | 0.876 | 0.847   | 0.901    |
| <b>BGLMM</b>     | 0.833 | 0.788   | 0.873    |
| <b>BGLMM-Int</b> | 0.843 | 0.808   | 0.874    |

617

618 **Table 6: Effect estimates, 95% credible intervals and p-values for multivariable regression**  
619 **model**

| Parameter                           | OR   | 2.5% CI | 97.5% CI | p-value |
|-------------------------------------|------|---------|----------|---------|
| Number of Clusters                  | 1.31 | 1.06    | 1.68     | 0.016   |
| Age                                 | 1.57 | 1.07    | 2.39     | 0.029   |
| History of Hematuria                | 1.40 | 1.17    | 1.69     | 0.003   |
| Dense/Atypical Clusters             | 1.84 | 1.41    | 2.39     | <0.001  |
| Number Isolated Atypical Cells      | 1.81 | 1.32    | 2.44     | <0.001  |
| Age: Number Isolated Atypical Cells | 0.80 | 0.65    | 0.99     | 0.050   |

620

### 621 **Univariable and Multivariable associations with Specimen Atypia**

622 **Table 6** demonstrates the importance of the individual slide level predictors through both  
623 univariable and multivariable regression modeling. A few predictors remained in the unpenalized  
624 statistical model after applying the horseshoe lasso (**Figure 5C**). This included positive  
625 associations with number of clusters, number of both atypical and dense clusters, number of  
626 isolated atypical cells and an interaction between age and atypia. The interaction demonstrates  
627 that overall specimen atypia younger individuals more greatly impacted by number of atypical  
628 urothelial cells as compared to older individuals.

629

### 630 **Web Application Example**

631 As a demonstration of Autoparis-X's ability to facilitate rapid examination of UC specimens, we  
632 examined four specimens with the web application (see **Supplementary Figures 5-7** for  
633 screenshots). Among thousands of specimens examined using this web tool, select cases  
634 (negative, atypical, suspicious, positive) can be further inspected using the demo application (see  
635 **Web Application and Software Availability**). The first case (**Supplementary Figure 5**)  
636 yielded an Atypia Burden Score of 0.14. Urothelial cells were selected with high atypia and were  
637 plotted on the WSI, revealing their locations. Zooming in on the WSI confirmed the reported  
638 cell-level statistics. We also used the table as means to rapidly examine all atypical cells in order

639 of decreasing atypia as a faster method to examine cells versus zooming in using the web  
640 application. These examinations confirmed that this was in fact an atypical specimen. The  
641 second case produced an atypia burden score of 0.6— a similar examination revealed specimen  
642 atypia on par with that of a suspicious assignment. The final case was a positive patient with an  
643 atypia burden score of 0.76. We focused on only a few cells which demonstrated the highest  
644 potential for malignancy in order to focus our examination given the high cellularity of the  
645 specimen. Many of these cells were nested in urothelial cell clusters. This search identified cells  
646 which were indeed highly malignant morphologically, allowing for rapid assignment of a  
647 positive finding. In **Supplementary Figure 8**, we used the WSI viewer to zoom in on a few  
648 malignant cells identified using the AutoParis-X web application.

649

## 650 **Discussion**

651 Advances in urine examination from ancient times to the information age have been  
652 accompanied by improvements in both specimen preparation and rigorous quantitative bladder  
653 cancer screening criteria <sup>4</sup>. Urine cytology (UC) examination for specimen atypia has emerged as  
654 the staple of modern-day bladder cancer screening and is often accompanied by more invasive  
655 methods for cases demonstrating suspicious or positive classifications. For example, TPS is a  
656 widely used grading system in urine cytology screening for bladder cancer, which assigns four  
657 main categories based on the presence of high-grade urothelial carcinoma cells and specific  
658 cellular features. Yet, despite advances in manual examination methods, there is often poor inter-  
659 rater variability in the interpretation of atypical or suspicious specimens, and TPS does not  
660 include rigorous criteria for evaluating urothelial cell clusters <sup>11,17,89–94</sup>. Automation in  
661 cytopathology can improve the reliability of cytological assessments and help clinicians address

662 growing numbers of tests and avoid diagnostic errors, as has been demonstrated in the  
663 gynecologic cytology market with the adoption of systems such as ThinPrep® Imaging System  
664 and FocalPoint™ GS Imaging system<sup>24</sup>. Existing systems for semi-autonomous UC examination  
665 have addressed many existing challenges, though have yet to adequately account for many  
666 additional complexities which can confound assessment (e.g., clusters, polyomavirus, etc.)<sup>20,21</sup>.  
667 In this study, we detailed the development of an artificial intelligence tool, AutoParis-X, which  
668 improves upon its previous incarnation, to allow for the rapid and nuanced examination of UC  
669 specimens; validation on a large-scale retrospective cohort illustrated the maturity and technical  
670 sophistication of this tool. For instance, challenges associated with calculation of NC ratios and  
671 overall cellular atypia within dense, overlapping urothelial cell clusters were addressed with  
672 remarkably good performance<sup>44</sup>. The importance of many previously understudied predictors  
673 were evaluated (e.g., number of atypical and dense urothelial clusters). Finally, the featured  
674 interactive web application was designed for ease-of-use for semi-autonomous diagnostic  
675 decision making.

676

677 All of these innovations suggest AutoParis-X's potential to greatly facilitate the process of  
678 bladder cancer screening, potentially resulting in a significant increase in diagnostic accuracy  
679 and a subsequent decrease in potential avenues for error (similar to what occurred with wide  
680 adoption of FocalPoint for Pap tests)<sup>31,95</sup>. For instance, results suggest that UroSeg can be used  
681 to accurately calculate NC ratios in a high-throughput manner. AutoParis-X can be used to  
682 examine hundreds to thousands of cytology specimens overnight, permitting semi-autonomous  
683 evaluation from the cytopathologist via the web application the following day (or in real time as  
684 results are generated). This is expected to increase the number and throughput of cytology exams



685 that can be performed by any given institution while accounting for the necessary safeguards  
686 (i.e., secondary manual review of random cohort of cases as is now done with Pap tests). Cases  
687 unable to be assessed using this web-based platform could be shunted to the classical manual  
688 interpretation pathway. With any newly introduced technology, rigorous real-world clinical trials  
689 will be required to evaluate the potential impact of adopting this system. As there are only  
690 limited applications of AI technologies in digital pathology that have been approved by the FDA  
691 for clinical usage, several existing practicalities are worth addressing before AutoParis-X can be  
692 safely employed in the clinic. Social barriers for adoption can be identified through surveys on  
693 attitudes and beliefs about the tool, which will allow for iterative refinement of the output display  
694 and additional algorithmic finetuning. AutoParis-X will also need to demonstrate non-inferiority  
695 in a clinical trial (i.e., random assignment of individuals to assessment via manual and semi-  
696 autonomous examination). As non-inferiority is evaluated with respect to a ground-truth  
697 measurement, it will be difficult to prove the utility of AutoParis-X to assign specimen atypia  
698 based on alignment to cytopathologist ratings alone given the high inter-observer variation (e.g.  
699 there is no universal, quantitative ground truth in urine cytology)<sup>12,17,93</sup>. Additional validation  
700 will likely require assessment of its capacity to predict more objective outcomes, such as disease  
701 recurrence or death<sup>96-99</sup>. Additionally, its cost-effectiveness over traditional methods will also  
702 need to be proven (e.g., CPT codes, RVUs, number of specimens per day, technologist and  
703 pathologist time spent), which will communicate revenue to be expected / workforce needed  
704 when operating the device<sup>100-103</sup>. A clearer understanding of how these tools can impact clinical  
705 decision making is needed before implementation (e.g., what conditions/thresholds are necessary  
706 to flag the case for manual review under a microscope)<sup>104</sup>.  
707

708 There are several limitations worth noting that will require future improvements and  
709 developments. We observed potential scanning artifacts (e.g., pixelation of cells), deficiencies in  
710 specimen preparation, high cellular density, and blood in the samples, which complicate the  
711 assessment. However, we have not yet developed methods to address these challenges. In  
712 addition to surveying attitudes, beliefs and adoption barriers, cytopathologists unfamiliar with  
713 digital technologies may favor assessment through analog means (e.g., microscope)– this will  
714 either require additional training and education on how to operate these nascent technologies or  
715 may require further subspecialization / training of cytopathologists to perform a digital  
716 assessment<sup>105–109</sup>. AutoParis-X does not account for Z-stacking of cytology slides which can be  
717 accounted for in future iterations to model cells in 3D<sup>73,110</sup>. Annotation of individual cells and  
718 clusters were performed by a small group of cytopathologists. Some of these annotations (e.g.,  
719 nucleus, delineation of cytoplasmic borders in clusters, cell type) may differ between  
720 cytopathologists. In addition, data was only collected and validated at a single institution which  
721 may limit generalization of these approaches as other institutions may have heterogenous patient  
722 characteristics/demographics and different specimen preparation methods<sup>111</sup>. Additional data  
723 collection from multiple institutions can ameliorate these potential challenges by improving the  
724 diversity of the dataset, allowing additional flexibility. There is also room for improvement for  
725 deriving slide level features. While we utilized Bayesian Optimization to decide which  
726 cells/clusters were atypical, dense, clusters, etc., consideration of additional thresholds or forms  
727 to summarize this information could improve the model accuracy. There exists a plethora of  
728 modeling approaches which can be utilized to predict specimen atypia. For instance, attention  
729 and graph-based neural network architectures can take as input the entire WSI broken into  
730 constituent cells, each of which has stored attribute/morphological information. and perform

731 what amounts to a weighted average across the cells to derive a final summary statistic <sup>112,113</sup>.  
732 The ordinal nature of UC class assignment was not explicitly taken into account for most of the  
733 results in this study and can be incorporated into these machine learning models using the  
734 appropriate model likelihoods <sup>114</sup>. Institutions aiming to adopt these digital technologies will also  
735 require significant computing infrastructure. This requires the purchase and utilization of GPU  
736 enabled compute nodes (cloud computing services such as AWS and Google Cloud present  
737 viable alternatives to in-house purchases), adoption of containerized workflows, which  
738 standardize and scale analyses, and hosting of front-facing applications with appropriate  
739 databasing, security and credentialling.

740

## 741 **Conclusion**

742 Bladder cancer screening through urine cytology exams is a tedious and fatigable process as  
743 cytopathologists assess tens to hundreds of thousands of cells per specimen. Algorithmic  
744 techniques to emulate these assessments are beginning to address the incredibly nuanced nature  
745 of these assessments. This study featured the design and large-scale validation of a digital  
746 diagnostic decision aid, AutoParis-X, which iterates on previous incarnations of urine cytology  
747 assessment algorithms to address many remaining complexities associated with challenging  
748 examination; further, it features a web application that allows for accurate and rapid examination  
749 of specimens. We encourage interested parties to utilize the AutoParis-X workflow and consider  
750 validating and finetuning the algorithm for other practice settings to enhance its wider  
751 generalizability. The current study demonstrated that quantitative digital urine cytology  
752 assessment methods have come of age and are prepared for further rigorous prospective  
753 evaluation to investigate its future role in augmenting clinical diagnostic decision making.



755 **References**

- 756
- 757 1. Barkan, G. A. *et al.* The Paris System for Reporting Urinary Cytology: The Quest to  
758 Develop a Standardized Terminology. *ACY* **60**, 185–197 (2016).
  - 759 2. Bostwick, D. G. 7 - Urine Cytology. in *Urologic Surgical Pathology (Fourth Edition)* (eds.  
760 Cheng, L., MacLennan, G. T. & Bostwick, D. G.) 322-357.e7 (Elsevier, 2020).
  - 761 3. Mossanen, M. & Gore, J. L. The burden of bladder cancer care: direct and indirect costs.  
762 *Curr Opin Urol* **24**, 487–491 (2014).
  - 763 4. Magiorkinis, E. & Diamantis, A. The fascinating story of urine examination: From  
764 uroscopy to the era of microscopy and beyond. *Diagnostic Cytopathology* **43**, 1020–1036  
765 (2015).
  - 766 5. Salem, S., Mitchell, R. E., El-Alim El-Dorey, A., Smith, J. A. & Barocas, D. A. Successful  
767 control of schistosomiasis and the changing epidemiology of bladder cancer in Egypt. *BJU*  
768 *international* **107**, 206–211 (2011).
  - 769 6. Botelho, M. C., Alves, H. & Richter, J. Halting Schistosoma haematobium-associated  
770 bladder cancer. *International journal of cancer management* **10**, (2017).
  - 771 7. Papanicolaou, G. N. Cytology of the urine sediment in neoplasms of the urinary tract. *The*  
772 *Journal of urology* **57**, 375–379 (1947).
  - 773 8. Layfield, L. J., Elsheikh, T. M., Fili, A., Nayar, R. & Shidham, V. Review of the state of the  
774 art and recommendations of the Papanicolaou Society of Cytopathology for urinary  
775 cytology procedures and reporting: the Papanicolaou Society of Cytopathology Practice  
776 Guidelines Task Force. *Diagnostic cytopathology* **30**, 24–30 (2004).
  - 777 9. Wang, Y.-H. *et al.* Diagnostic Agreement for High-Grade Urothelial Cell Carcinoma in  
778 Atypical Urine Cytology: A Nationwide Survey Reveals a Tendency for Overestimation in  
779 Specimens with an N/C Ratio Approaching 0.5. *Cancers* **12**, 272 (2020).
  - 780 10. Barkan, G. A. Enough is enough: adequacy of voided urine cytology. (2016).
  - 781 11. Roy, M. *et al.* An institutional experience with The Paris System: A paradigm shift from  
782 ambiguous terminology to more objective criteria for reporting urine cytology.  
783 *Cytopathology* **28**, 509–515 (2017).
  - 784 12. Levy, J. J. *et al.* Large-scale longitudinal comparison of urine cytological classification  
785 systems reveals potential early adoption of The Paris System criteria. *J Am Soc Cytopathol*  
786 *S2213-2945(22)00241-1* (2022) doi:10.1016/j.jasc.2022.08.001.
  - 787 13. Kurtycz, D. F., Wojcik, E. M. & Rosenthal, D. L. Perceptions of Paris: an international  
788 survey in preparation for The Paris System for Reporting Urinary Cytology 2.0 (TPS 2.0).  
789 *Journal of the American Society of Cytopathology* **12**, 66–74 (2023).
  - 790 14. Nikas, I. P. *et al.* The Paris System for Reporting Urinary Cytology: A Meta-Analysis.  
791 *Journal of Personalized Medicine* **12**, 170 (2022).
  - 792 15. Wojcik, E. M., Kurtycz, D. F. & Rosenthal, D. L. *The Paris system for reporting urinary*  
793 *cytology*. (Springer, 2022).
  - 794 16. Wojcik, E. M., Kurtycz, D. F. & Rosenthal, D. L. We'll always have Paris the Paris system  
795 for reporting urinary cytology 2022. *Journal of the American Society of Cytopathology* **11**,  
796 62–66 (2022).
  - 797 17. Long, T. *et al.* Interobserver reproducibility of The Paris System for Reporting Urinary  
798 Cytology. *Cytojournal* **14**, 17 (2017).

- 799 18. Landau, M. S. & Pantanowitz, L. Artificial intelligence in cytopathology: a review of the  
800 literature and overview of commercial landscape. *Journal of the American Society of*  
801 *Cytopathology* **8**, 230–241 (2019).
- 802 19. Pouliakis, A. *et al.* Artificial Neural Networks as Decision Support Tools in Cytopathology:  
803 Past, Present, and Future. *Biomed Eng Comput Biol* **7**, 1–18 (2016).
- 804 20. McAlpine, E. D., Pantanowitz, L. & Michelow, P. M. Challenges Developing Deep  
805 Learning Algorithms in Cytology. *ACY* **65**, 301–309 (2021).
- 806 21. Thiryayi, S. A. & Rana, D. N. Urine cytopathology: challenges, pitfalls, and mimics.  
807 *Diagnostic Cytopathology* **40**, 1019–1034 (2012).
- 808 22. Jiang, H. *et al.* Deep learning for computational cytology: A survey. *Med Image Anal* **84**,  
809 102691 (2023).
- 810 23. Rezende, M. T., Bianchi, A. G. C. & Carneiro, C. M. Cervical cancer: Automation of Pap  
811 test screening. *Diagn Cytopathol* **49**, 559–574 (2021).
- 812 24. Okuda, C. *et al.* Quantitative cytomorphological comparison of SurePath and ThinPrep  
813 liquid-based cytology using high-grade urothelial carcinoma cells. *Cytopathology* **32**, 654–  
814 659 (2021).
- 815 25. Tolles, W. E. The cytoanalyzer-an example of physics in medical research. *Trans N Y Acad*  
816 *Sci* **17**, 250–256 (1955).
- 817 26. Bourghardt, S., Hyden, H. & Nyquist, B. A scanning and computing microphotometer for  
818 cell analyses. *Experientia* **11**, 163–165 (1955).
- 819 27. Abels, E. *et al.* Computational pathology definitions, best practices, and recommendations  
820 for regulatory guidance: a white paper from the Digital Pathology Association. *J Pathol*  
821 **249**, 286–294 (2019).
- 822 28. Pantanowitz, L. Improving the Pap test with artificial intelligence. *Cancer Cytopathol* **130**,  
823 402–404 (2022).
- 824 29. Xue, P. *et al.* Deep learning in image-based breast and cervical cancer detection: a  
825 systematic review and meta-analysis. *NPJ Digit Med* **5**, 19 (2022).
- 826 30. Hou, X. *et al.* Artificial Intelligence in Cervical Cancer Screening and Diagnosis. *Front*  
827 *Oncol* **12**, 851367 (2022).
- 828 31. Thrall, M. J. Automated screening of Papanicolaou tests: A review of the literature. *Diagn*  
829 *Cytopathol* **47**, 20–27 (2019).
- 830 32. Chantziantoniou, N. BestCyte® Cell Sorter Imaging System: Primary and adjudicative  
831 whole slide image rescreening review times of 500 ThinPrep Pap test thin-layers - An intra-  
832 observer, time-surrogate analysis of diagnostic confidence potentialities. *J Pathol Inform*  
833 **13**, 100095 (2022).
- 834 33. Delga, A. *et al.* Evaluation of CellSolutions BestPrep® automated thin-layer liquid-based  
835 cytology Papanicolaou slide preparation and BestCyte® cell sorter imaging system. *Acta*  
836 *Cytol* **58**, 469–477 (2014).
- 837 34. Pantanowitz, L. & Bui, M. M. Image Analysis in Cytopathology. in *Monographs in Clinical*  
838 *Cytology* (eds. Bui, M. M. & Pantanowitz, L.) vol. 25 91–98 (S. Karger AG, 2020).
- 839 35. Pantanowitz, L., Hornish, M. & Goulart, R. A. Informatics applied to cytology. *Cytojournal*  
840 **5**, 16 (2008).
- 841 36. Wilbur, D. C. Digital cytology: current state of the art and prospects for the future. *Acta*  
842 *Cytol* **55**, 227–238 (2011).
- 843 37. Dov, D. *et al.* Weakly supervised instance learning for thyroid malignancy prediction from  
844 whole slide cytopathology images. *Med Image Anal* **67**, 101814 (2021).

- 845 38. Yao, K. *et al.* A Study of Thyroid Fine Needle Aspiration of Follicular Adenoma in the  
846 ‘Atypia of Undetermined Significance’ Bethesda Category Using Digital Image Analysis. *J*  
847 *Pathol Inform* **13**, 100004 (2022).
- 848 39. Girolami, I. *et al.* Impact of image analysis and artificial intelligence in thyroid pathology,  
849 with particular reference to cytological aspects. *Cytopathology* **31**, 432–444 (2020).
- 850 40. Sanyal, P., Mukherjee, T., Barui, S., Das, A. & Gangopadhyay, P. Artificial Intelligence in  
851 Cytopathology: A Neural Network to Identify Papillary Carcinoma on Thyroid Fine-Needle  
852 Aspiration Cytology Smears. *J Pathol Inform* **9**, 43 (2018).
- 853 41. Elliott Range, D. D. *et al.* Application of a machine learning algorithm to predict  
854 malignancy in thyroid cytopathology. *Cancer Cytopathol* **128**, 287–295 (2020).
- 855 42. Guan, Q. *et al.* Deep convolutional neural network VGG-16 model for differential  
856 diagnosing of papillary thyroid carcinomas in cytological images: a pilot study. *J Cancer*  
857 **10**, 4876–4882 (2019).
- 858 43. Sanghvi, A. B., Allen, E. Z., Callenberg, K. M. & Pantanowitz, L. Performance of an  
859 artificial intelligence algorithm for reporting urine cytopathology. *Cancer Cytopathology*  
860 **127**, 658–666 (2019).
- 861 44. Levy, J. J. *et al.* Uncovering additional predictors of urothelial carcinoma from voided  
862 urothelial cell clusters through a deep learning-based image preprocessing technique.  
863 *Cancer Cytopathol* (2022) doi:10.1002/cncy.22633.
- 864 45. Mahmood, F. *et al.* Deep Adversarial Training for Multi-Organ Nuclei Segmentation in  
865 Histopathology Images. *IEEE Transactions on Medical Imaging* (2020)  
866 doi:10.1109/TMI.2019.2927182.
- 867 46. Bankhead, P. *et al.* QuPath: Open source software for digital pathology image analysis. *Sci*  
868 *Rep* **7**, 1–7 (2017).
- 869 47. Humphries, M. P., Maxwell, P. & Salto-Tellez, M. QuPath: The global impact of an open  
870 source digital pathology system. *Computational and Structural Biotechnology Journal* **19**,  
871 852–859 (2021).
- 872 48. Vaickus, L. J., Suriawinata, A. A., Wei, J. W. & Liu, X. Automating the Paris System for  
873 urine cytopathology—A hybrid deep-learning and morphometric approach. *Cancer*  
874 *Cytopathology* **127**, 98–115 (2019).
- 875 49. Singh, H. K., Bubendorf, L., Mihatsch, M. J., Drachenberg, C. B. & Nিকেleit, V. Urine  
876 Cytology Findings of Polyomavirus Infections. in *Polyomaviruses and Human Diseases*  
877 (ed. Ahsan, N.) 201–212 (Springer, 2006). doi:10.1007/0-387-32957-9\_15.
- 878 50. Paszke, A. *et al.* PyTorch: An Imperative Style, High-Performance Deep Learning Library.  
879 *arXiv:1912.01703 [cs, stat]* (2019).
- 880 51. Wu, Y., Kirillov, A., Massa, F., Lo, W.-Y. & Girshick, R. Detectron2. (2019).
- 881 52. Matthes, E. *Python Crash Course, 2nd Edition: A Hands-On, Project-Based Introduction to*  
882 *Programming*. (No Starch Press, 2019).
- 883 53. Bürkner, P.-C. brms: An R Package for Bayesian Multilevel Models Using Stan. *Journal of*  
884 *Statistical Software* **80**, 1–28 (2017).
- 885 54. Tippmann, S. Programming tools: Adventures with R. *Nature* **517**, 109–110 (2015).
- 886 55. Rocklin, M. Dask: Parallel Computation with Blocked algorithms and Task Scheduling. in  
887 126–132 (2015). doi:10.25080/Majora-7b98e3ed-013.
- 888 56. Harvey, S. E. & VandenBussche, C. J. Nuclear membrane irregularity in high-grade  
889 urothelial carcinoma cells can be measured by using circularity and solidity as

- 890 morphometric shape definitions in digital image analysis of urinary tract cytology  
891 specimens. *Cancer Cytopathol* (2023) doi:10.1002/ency.22682.
- 892 57. Louppe, G. Bayesian optimisation with scikit-optimize. in *PyData Amsterdam* (2017).
- 893 58. Sigrist, F. Gaussian Process Boosting. *Journal of Machine Learning Research* **23**, 1–46  
894 (2022).
- 895 59. Sigrist, F. Latent Gaussian Model Boosting. *IEEE Transactions on Pattern Analysis and*  
896 *Machine Intelligence* 1–1 (2022) doi:10.1109/TPAMI.2022.3168152.
- 897 60. Tan, Y. V. & Roy, J. Bayesian additive regression trees and the General BART model.  
898 *Statistics in Medicine* **38**, 5048–5069 (2019).
- 899 61. Chipman, H. A., George, E. I. & McCulloch, R. E. BART: Bayesian additive regression  
900 trees. *The Annals of Applied Statistics* **4**, 266–298 (2010).
- 901 62. Hajjem, A., Bellavance, F. & Larocque, D. Mixed-effects random forest for clustered data.  
902 *Journal of Statistical Computation and Simulation* **84**, 1313–1328 (2014).
- 903 63. Levy, J. J. *et al.* Mixed Effects Machine Learning Models for Colon Cancer Metastasis  
904 Prediction using Spatially Localized Immuno-Oncology Markers. *Pac Symp Biocomput* **27**,  
905 175–186 (2022).
- 906 64. Bürkner, P.-C. Advanced Bayesian Multilevel Modeling with the R Package brms. *The R*  
907 *Journal* **10**, 395–411 (2018).
- 908 65. Perkel, J. M. Data visualization tools drive interactivity and reproducibility in online  
909 publishing. *Nature* **554**, 133–134 (2018).
- 910 66. Bradski, G. The openCV library. *Dr. Dobb's Journal: Software Tools for the Professional*  
911 *Programmer* **25**, 120–123 (2000).
- 912 67. Virtanen, P. *et al.* SciPy 1.0: fundamental algorithms for scientific computing in Python.  
913 *Nature methods* **17**, 261–272 (2020).
- 914 68. Silversmith, W. fill-voids: Fill voids in 3D binary images fast.
- 915 69. Nishino, R. & Loomis, S. H. C. Cupy: A numpy-compatible library for nvidia gpu  
916 calculations. *31st conference on neural information processing systems* **151**, (2017).
- 917 70. Cheng, B. *et al.* Panoptic-DeepLab: A Simple, Strong, and Fast Baseline for Bottom-Up  
918 Panoptic Segmentation. *arXiv:1911.10194 [cs]* (2020).
- 919 71. Van der Walt, S. *et al.* scikit-image: image processing in Python. *PeerJ* **2**, e453 (2014).
- 920 72. Pedregosa, F. *et al.* Scikit-learn: Machine Learning in Python. *Journal of Machine Learning*  
921 *Research* **12**, 2825–2830 (2011).
- 922 73. Kim, D. *et al.* Evaluating the role of Z-stack to improve the morphologic evaluation of  
923 urine cytology whole slide images for high-grade urothelial carcinoma: Results and review  
924 of a pilot study. *Cancer Cytopathology* **130**, 630–639 (2022).
- 925 74. Allison, D. B. *et al.* Should the BK polyomavirus cytopathic effect be best classified as  
926 atypical or benign in urine cytology specimens? *Cancer cytopathology* **124**, 436–442  
927 (2016).
- 928 75. Wu, Z. *et al.* Representing long-range context for graph neural networks with global  
929 attention. *Advances in Neural Information Processing Systems* **34**, 13266–13279 (2021).
- 930 76. Levy, J. J., Salas, L. A., Christensen, B. C., Sriharan, A. & Vaickus, L. J. PathFlowAI: A  
931 High-Throughput Workflow for Preprocessing, Deep Learning and Interpretation in Digital  
932 Pathology. *Pac Symp Biocomput* **25**, 403–414 (2020).
- 933 77. Sundararajan, M., Taly, A. & Yan, Q. Axiomatic attribution for deep networks. in  
934 *Proceedings of the 34th International Conference on Machine Learning - Volume 70* 3319–  
935 3328 (JMLR.org, 2017).



- 936 78. Kokhlikyan, N. *et al.* Captum: A unified and generic model interpretability library for  
937 PyTorch. *arXiv:2009.07896 [cs, stat]* (2020).
- 938 79. Falk, T. *et al.* U-Net: deep learning for cell counting, detection, and morphometry. *Nature*  
939 *methods* **16**, 67–70 (2019).
- 940 80. Ronneberger, O., Fischer, P. & Brox, T. U-net: Convolutional networks for biomedical  
941 image segmentation. in *Medical Image Computing and Computer-Assisted Intervention–*  
942 *MICCAI 2015: 18th International Conference, Munich, Germany, October 5-9, 2015,*  
943 *Proceedings, Part III* 18 234–241 (Springer, 2015).
- 944 81. He, K., Zhang, X., Ren, S. & Sun, J. Deep Residual Learning for Image Recognition. in  
945 *2016 IEEE Conference on Computer Vision and Pattern Recognition (CVPR)* 770–778  
946 (2016). doi:10.1109/CVPR.2016.90.
- 947 82. Koss, L. G., Deitch, D., Ramanathan, R. & Sherman, A. B. Diagnostic value of cytology of  
948 voided urine. *Acta cytologica* **29**, 810–816 (1985).
- 949 83. Onur, I., Rosenthal, D. L. & VandenBussche, C. J. Benign-appearing urothelial tissue  
950 fragments in noninstrumented voided urine specimens are associated with low rates of  
951 urothelial neoplasia. *Cancer Cytopathology* **123**, 180–185 (2015).
- 952 84. Thompson, C. G., Kim, R. S., Aloe, A. M. & Becker, B. J. Extracting the variance inflation  
953 factor and other multicollinearity diagnostics from typical regression results. *Basic and*  
954 *Applied Social Psychology* **39**, 81–90 (2017).
- 955 85. Carvalho, C. M., Polson, N. G. & Scott, J. G. Handling Sparsity via the Horseshoe. in  
956 *Artificial Intelligence and Statistics* 73–80 (PMLR, 2009).
- 957 86. McKinley, T. J., Morters, M. & Wood, J. L. N. Bayesian Model Choice in Cumulative Link  
958 Ordinal Regression Models. *Bayesian Analysis* **10**, 1–30 (2015).
- 959 87. Bender, R. & Grouven, U. Ordinal Logistic Regression in Medical Research. *J R Coll*  
960 *Physicians Lond* **31**, 546–551 (1997).
- 961 88. OpenSeadragon. <http://openseadragon.github.io/>.
- 962 89. Wolfson, W. L. & Rosenthal, D. L. Cell clusters in urinary cytology. *Acta Cytol* **22**, 138–  
963 141 (1978).
- 964 90. Mikou, P. *et al.* Evaluation of the Paris System in atypical urinary cytology. *Cytopathology*  
965 **29**, 545–549 (2018).
- 966 91. Kurtycz, D. F. *et al.* Paris interobserver reproducibility study (PIRST). *Journal of the*  
967 *American Society of Cytopathology* **7**, 174–184 (2018).
- 968 92. Kurtycz, D. F. I., Sundling, K. E. & Barkan, G. A. The Paris system of Reporting Urinary  
969 Cytology: Strengths and opportunities. *Diagnostic Cytopathology* **48**, 890–895 (2020).
- 970 93. Bakkar, R. *et al.* Impact of the Paris system for reporting urine cytopathology on predictive  
971 values of the equivocal diagnostic categories and interobserver agreement. *Cytojournal* **16**,  
972 (2019).
- 973 94. Hassan, M. *et al.* Impact of Implementing the Paris System for Reporting Urine Cytology in  
974 the Performance of Urine Cytology: A Correlative Study of 124 Cases. *American Journal*  
975 *of Clinical Pathology* **146**, 384–390 (2016).
- 976 95. Pantanowitz, L. Automated pap tests. *Practical Informatics for Cytopathology* 147–155  
977 (2014).
- 978 96. Yamashita, S. *et al.* Urethral recurrence following neobladder in bladder cancer patients.  
979 *The Tohoku Journal of Experimental Medicine* **199**, 197–203 (2003).

- 980 97. Pierconti, F. *et al.* DNA methylation analysis in urinary samples: A useful method to  
981 predict the risk of neoplastic recurrence in patients with urothelial carcinoma of the bladder  
982 in the high-risk group. *Cancer Cytopathology* **n/a**,  
983 98. Shalata, A. T. *et al.* Predicting Recurrence of Non-Muscle-Invasive Bladder Cancer:  
984 Current Techniques and Future Trends. *Cancers* **14**, 5019 (2022).  
985 99. Soorojebally, Y. *et al.* Urinary biomarkers for bladder cancer diagnosis and NMIBC follow-  
986 up: a systematic review. *World J Urol* **41**, 345–359 (2023).  
987 100. Lujan, G. *et al.* Dissecting the business case for adoption and implementation of digital  
988 pathology: a white paper from the digital pathology association. *Journal of Pathology*  
989 *Informatics* **12**, 17 (2021).  
990 101. Acs, B. & Rimm, D. L. Not just digital pathology, intelligent digital pathology. *JAMA*  
991 *oncology* **4**, 403–404 (2018).  
992 102. Jones-Hall, Y. Digital pathology in academia: Implementation and impact. *Lab Animal* **50**,  
993 229–231 (2021).  
994 103. Olswang, L. B. & Prelock, P. A. Bridging the gap between research and practice:  
995 Implementation science. *Journal of Speech, Language, and Hearing Research* **58**, S1818–  
996 S1826 (2015).  
997 104. Li, R. C., Asch, S. M. & Shah, N. H. Developing a delivery science for artificial  
998 intelligence in healthcare. *npj Digit. Med.* **3**, 1–3 (2020).  
999 105. Char, D. S., Abràmoff, M. D. & Feudtner, C. Identifying ethical considerations for machine  
1000 learning healthcare applications. *The American Journal of Bioethics* **20**, 7–17 (2020).  
1001 106. Jackson, B. R. *et al.* The Ethics of Artificial Intelligence in Pathology and Laboratory  
1002 Medicine: Principles and Practice. *Acad Pathol* **8**, (2021).  
1003 107. Chauhan, C. & Gullapalli, R. R. Ethics of AI in pathology: current paradigms and emerging  
1004 issues. *The American journal of pathology* **191**, 1673–1683 (2021).  
1005 108. Baxi, V., Edwards, R., Montalto, M. & Saha, S. Digital pathology and artificial intelligence  
1006 in translational medicine and clinical practice. *Modern Pathology* **35**, 23–32 (2022).  
1007 109. Niazi, M. K. K., Parwani, A. V. & Gurcan, M. N. Digital pathology and artificial  
1008 intelligence. *The Lancet Oncology* **20**, e253–e261 (2019).  
1009 110. Bouyssoux, A., Fezzani, R. & Olivo-Marin, J.-C. Cell Instance Segmentation Using Z-  
1010 Stacks in Digital Cytology. in *2022 IEEE 19th International Symposium on Biomedical*  
1011 *Imaging (ISBI)* 1–4 (2022). doi:10.1109/ISBI52829.2022.9761495.  
1012 111. Vaickus, L. J. & Tambouret, R. H. Young investigator challenge: The accuracy of the  
1013 nuclear-to-cytoplasmic ratio estimation among trained morphologists. *Cancer Cytopathol*  
1014 **123**, 524–530 (2015).  
1015 112. Butke, J. *et al.* End-to-end Multiple Instance Learning for Whole-Slide Cytopathology of  
1016 Urothelial Carcinoma. in *Proceedings of the MICCAI Workshop on Computational*  
1017 *Pathology* 57–68 (PMLR, 2021).  
1018 113. Lu, M. Y. *et al.* Data-efficient and weakly supervised computational pathology on whole-  
1019 slide images. *Nature Biomedical Engineering* 1–16 (2021) doi:10.1038/s41551-020-00682-  
1020 w.  
1021 114. Vargas, V. M., Gutiérrez, P. A. & Hervás-Martínez, C. Cumulative link models for deep  
1022 ordinal classification. *Neurocomputing* **401**, 48–58 (2020).  
1023  
1024

1025

1026 **Appendix**

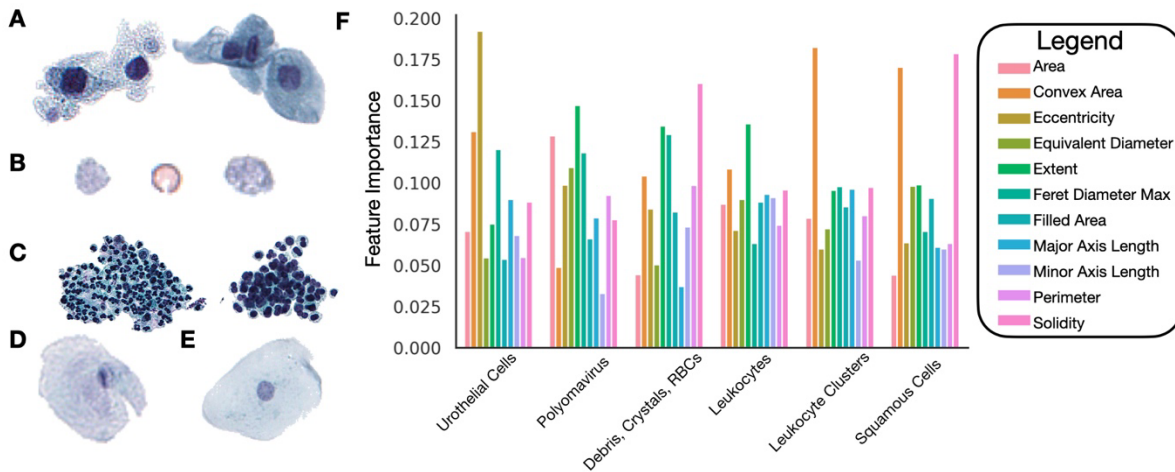

1027 **Supplementary Figure 1: Important morphometric measures:** A) Urothelial cells with high  
 1028 eccentricity; B) RBCs and crystals with high solidity; C) Leukocyte clusters with high convex  
 1029 area; D) Squamous cell with high convex area; E) Squamous cell with high solidity; F)  
 1030 Important morphometric features as determined using IntegratedGradients to accompany raw  
 1031 image features  
 1032  
 1033

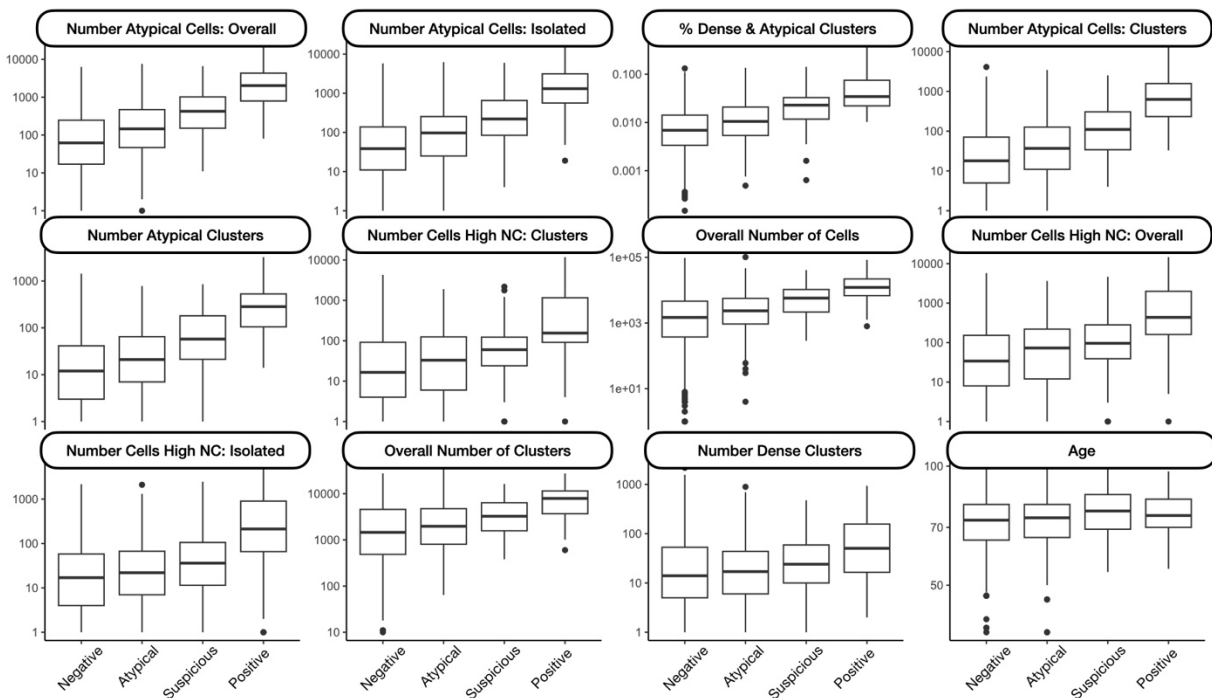

1034 **Supplementary Figure 2: Correlation Each Slide Feature and UC Atypia,** ordered by  
 1035 predictiveness of each feature (spearman correlation / ordinal regression)  
 1036  
 1037

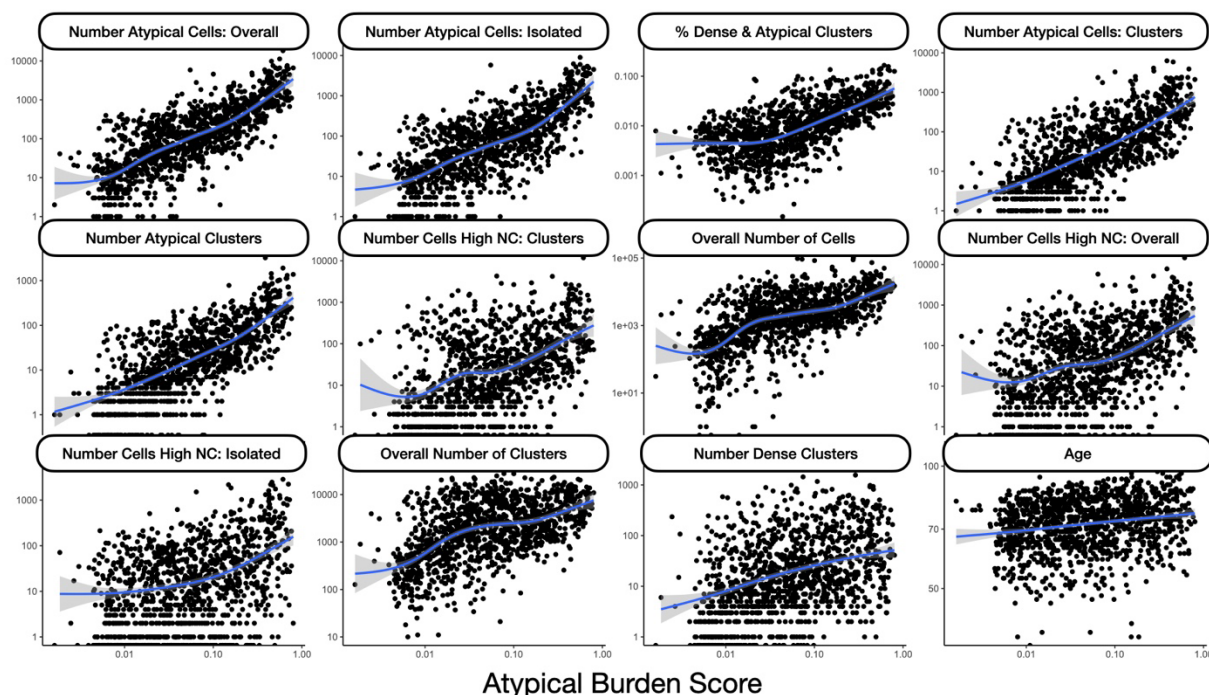

1038  
1039  
1040  
1041  
1042  
1043  
1044

**Supplementary Figure 3: Correlation Each Slide Feature and ABS**, ordered by predictiveness of each feature for UC diagnostic category (spearman correlation / ordinal regression)

**Supplementary Table 1: Spearman correlation between imaging predictors, ABS and original UC Class**

| Predictor                                | ABS  |         |          |         | Original Diagnosis |         |          |         |  |
|------------------------------------------|------|---------|----------|---------|--------------------|---------|----------|---------|--|
|                                          | r    | 2.5% CI | 97.5% CI | p-value | r                  | 2.5% CI | 97.5% CI | p-value |  |
| Overall number atypical cells            | 0.78 | 0.76    | 0.8      | <0.001  | 0.38               | 0.33    | 0.42     | <0.001  |  |
| Overall number cells with high NC        | 0.53 | 0.48    | 0.56     | <0.001  | 0.27               | 0.22    | 0.32     | <0.001  |  |
| Number of cells                          | 0.63 | 0.6     | 0.67     | <0.001  | 0.29               | 0.24    | 0.34     | <0.001  |  |
| Number of isolated atypical cells        | 0.73 | 0.7     | 0.75     | <0.001  | 0.37               | 0.32    | 0.42     | <0.001  |  |
| Number of isolated cells with high NC    | 0.44 | 0.39    | 0.48     | <0.001  | 0.24               | 0.19    | 0.29     | <0.001  |  |
| Number of atypical cells in clusters     | 0.75 | 0.73    | 0.78     | <0.001  | 0.36               | 0.31    | 0.41     | <0.001  |  |
| Number of cells in clusters with high NC | 0.57 | 0.53    | 0.61     | <0.001  | 0.3                | 0.25    | 0.35     | <0.001  |  |
| Number of dense clusters                 | 0.45 | 0.4     | 0.49     | <0.001  | 0.14               | 0.09    | 0.2      | <0.001  |  |
| Number of clusters                       | 0.53 | 0.49    | 0.57     | <0.001  | 0.21               | 0.15    | 0.26     | <0.001  |  |
| Number of dense/atypical clusters        | 0.68 | 0.65    | 0.71     | <0.001  | 0.37               | 0.32    | 0.41     | <0.001  |  |
| Number of atypical clusters              | 0.77 | 0.75    | 0.79     | <0.001  | 0.36               | 0.31    | 0.41     | <0.001  |  |
| Age                                      | 0.21 | 0.16    | 0.26     | <0.001  | 0.11               | 0.06    | 0.16     | <0.001  |  |

1045  
1046  
1047

**Supplementary Table 2: Summary statistics (median, interquartile range) for each slide level feature and UC Class**

|                                                  | Overall                   | Negative                  | Atypical                  | Suspicious                  | Positive                     | p      |
|--------------------------------------------------|---------------------------|---------------------------|---------------------------|-----------------------------|------------------------------|--------|
| <b>N</b>                                         | <b>1252</b>               | <b>810</b>                | <b>296</b>                | <b>98</b>                   | <b>48</b>                    |        |
| Overall number atypical cells (median [IQR])     | 111.00 [24.00, 374.50]    | 59.00 [16.00, 240.50]     | 145.50 [46.75, 469.00]    | 424.50 [151.50, 1018.50]    | 2029.50 [795.50, 4322.00]    | <0.001 |
| Overall number cells with high NC (median [IQR]) | 39.00 [6.00, 170.50]      | 24.00 [3.00, 120.75]      | 68.00 [10.00, 197.75]     | 96.00 [36.00, 279.25]       | 436.00 [160.50, 1995.75]     | <0.001 |
| Number of cells (median [IQR])                   | 2046.50 [590.25, 5856.25] | 1480.00 [370.25, 4604.25] | 2345.50 [933.50, 5629.50] | 5734.00 [2165.50, 10514.00] | 12178.00 [6810.00, 22094.75] | <0.001 |

|                                                                |                           |                           |                           |                            |                             |        |
|----------------------------------------------------------------|---------------------------|---------------------------|---------------------------|----------------------------|-----------------------------|--------|
| <b>Number of isolated atypical cells (median [IQR])</b>        | 57.50 [14.75, 212.25]     | 36.00 [9.00, 130.25]      | 94.50 [25.00, 252.75]     | 220.50 [84.50, 652.00]     | 1308.50 [565.25, 3127.50]   | <0.001 |
| <b>Number of isolated cells with high NC (median [IQR])</b>    | 11.00 [1.00, 53.00]       | 7.00 [1.00, 38.00]        | 17.00 [3.00, 60.00]       | 28.00 [6.25, 89.75]        | 194.00 [51.00, 821.00]      | <0.001 |
| <b>Number of atypical cells in clusters (median [IQR])</b>     | 24.00 [5.00, 110.25]      | 15.00 [3.00, 65.00]       | 36.00 [10.00, 123.75]     | 110.50 [34.25, 306.75]     | 631.50 [236.75, 1578.50]    | <0.001 |
| <b>Number of cells in clusters with high NC (median [IQR])</b> | 16.00 [2.00, 94.25]       | 9.00 [1.00, 53.00]        | 29.00 [5.00, 118.25]      | 59.00 [23.25, 122.00]      | 155.00 [92.25, 1159.25]     | <0.001 |
| <b>Number of dense clusters (median [IQR])</b>                 | 14.00 [4.00, 50.00]       | 11.00 [3.00, 45.75]       | 15.00 [4.75, 40.25]       | 22.50 [9.25, 59.00]        | 51.00 [16.50, 157.00]       | <0.001 |
| <b>Number of clusters (median [IQR])</b>                       | 1838.50 [674.75, 5228.50] | 1455.50 [486.25, 4579.75] | 1974.00 [807.50, 4744.25] | 3255.00 [1574.25, 6367.25] | 7917.50 [3695.50, 11501.00] | <0.001 |
| <b>% clusters dense/atypical (median [IQR])</b>                | 0.01 [0.00, 0.02]         | 0.01 [0.00, 0.01]         | 0.01 [0.01, 0.02]         | 0.02 [0.01, 0.03]          | 0.03 [0.02, 0.07]           | <0.001 |
| <b>Number of atypical clusters (median [IQR])</b>              | 14.50 [3.00, 54.25]       | 9.00 [2.00, 36.00]        | 20.00 [6.00, 62.25]       | 57.50 [21.25, 180.75]      | 283.50 [105.50, 530.50]     | <0.001 |
| <b>ABS (median [IQR])</b>                                      | 0.05 [0.02, 0.15]         | 0.03 [0.01, 0.08]         | 0.07 [0.03, 0.18]         | 0.24 [0.15, 0.40]          | 0.42 [0.29, 0.57]           | <0.001 |

1048

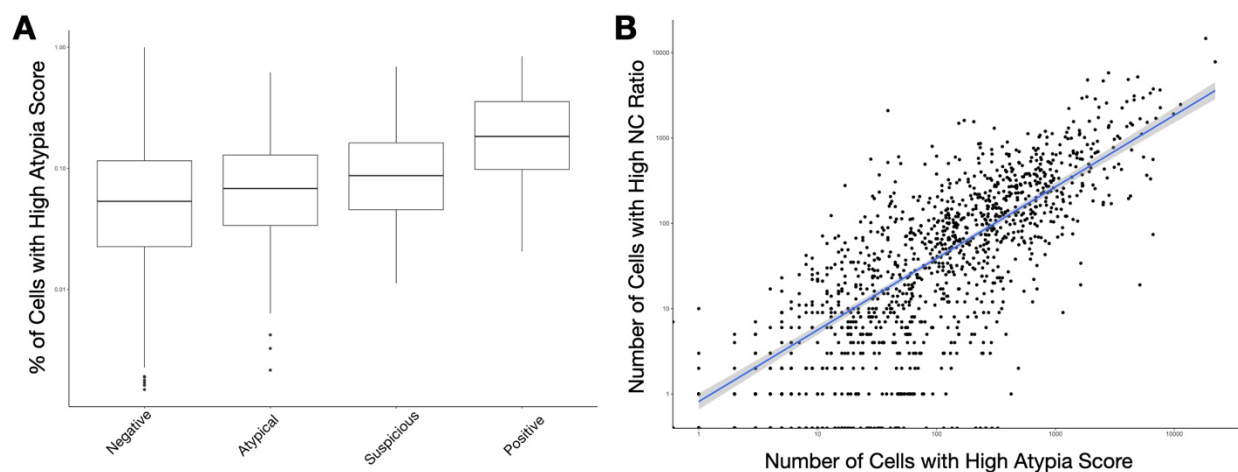

1049

1050

1051

1052

1053

1054

1055

**Supplementary Figure 4: Additional associations with specimen atypia: A)** Boxplots depicting correlation between the percentage of urothelial cells with high atypia and UC Class; **B)** Scatterplot demonstrating correlation between slide level atypia via number of cells with high atypia and high NC ratio

### AUTOPARIS-X WEB APPLICATION DEMO

Instructions:

[Watch Tutorial](#)

1. Select patient to return atypical burden score.
2. Select urothelial cells using cutoff probability.
3. Select malignant cells using lasso tool.
4. Click 'Toggle Annotations', inspect via WSI/table.

Select Patient: Atypical Burden Score:

Patient 2, Atypical 0.14

Select Urothelial Threshold (0-1):

[More Info](#)

Select Malignant Cells:

[More Info](#)

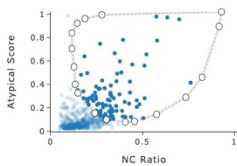

Emphasis on malignant cells?:

[More Info](#)

NO SCALING
  NC RATIO
  ATYPYA SCORE
  UROTHELIAL SCORE

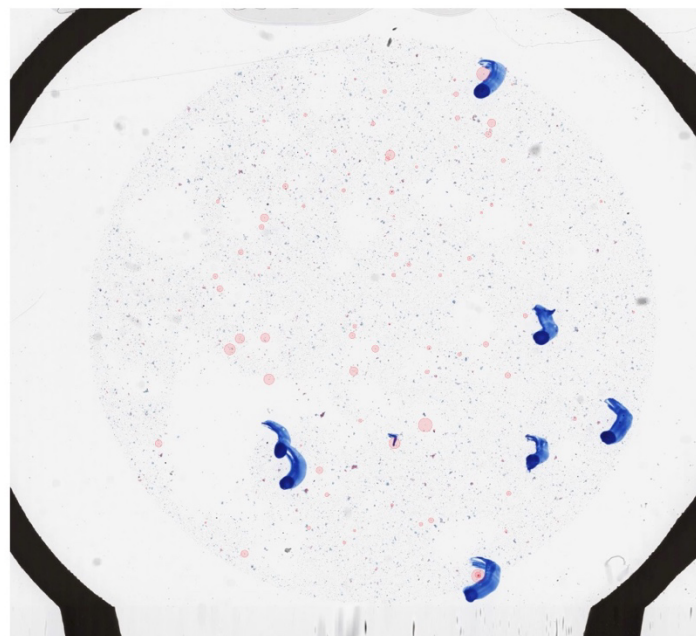

### VIEW MALIGNANT CELL TABLE

Sort table on: [More Info](#)

NO SORT
  NC RATIO
  ATYPYA SCORE

Max number cells in table:

50 75 100 125 150 175 200

| IMAGE | NC RATIO | ATYPYA |
|-------|----------|--------|
|       | 0.763    | 0.417  |
|       | 0.701    | 0.956  |
|       | 0.636    | 0.972  |
|       | 0.522    | 0.657  |
|       | 0.512    | 0.284  |
|       | 0.511    | 0.561  |
|       | 0.484    | 0.232  |
|       | 0.469    | 0.266  |
|       | 0.445    | 0.572  |
|       | 0.408    | 0.125  |
|       | 0.404    | 0.253  |
|       | 0.393    | 0.128  |
|       | 0.389    | 0.177  |
|       | 0.363    | 0.494  |
|       | 0.359    | 0.429  |
|       | 0.357    | 0.318  |
|       | 0.349    | 0.667  |
|       | 0.344    | 0.284  |
|       | 0.341    | 0.109  |
|       | 0.337    | 0.128  |

1056  
1057  
1058

**Supplementary Figure 5: Example of identifying malignant cells in atypical slide**

### AUTOPARIS-X WEB APPLICATION DEMO

Instructions:

[Watch Tutorial](#)

1. Select patient to return atypical burden score.
2. Select urothelial cells using cutoff probability.
3. Select malignant cells using lasso tool.
4. Click 'Toggle Annotations', inspect via WSI/table.

Select Patient: Atypical Burden Score:

Patient 3, Suspicious 0.6

Select Urothelial Threshold (0-1):

[More Info](#)

Select Malignant Cells:

[More Info](#)

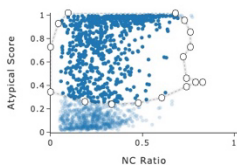

Emphasis on malignant cells?:

[More Info](#)

NO SCALING
  NC RATIO
  ATYPYA SCORE
  UROTHELIAL SCORE

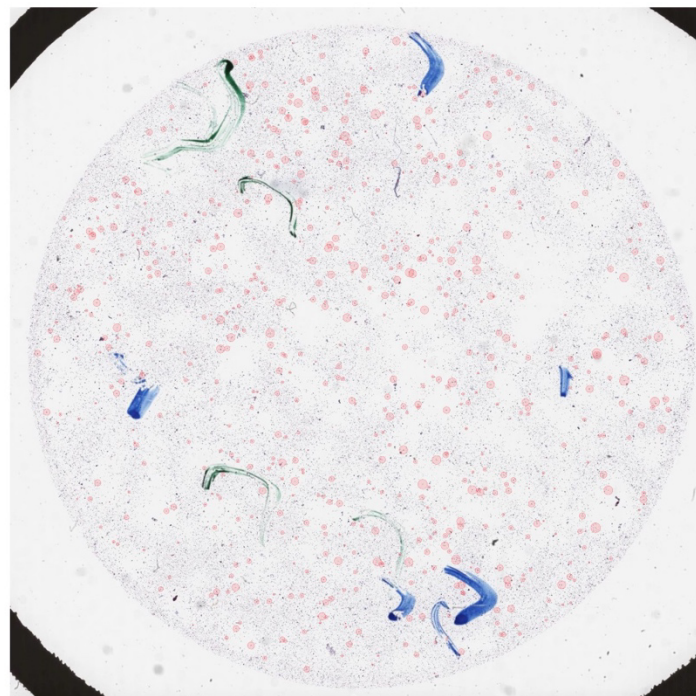

### VIEW MALIGNANT CELL TABLE

Sort table on: [More Info](#)

NO SORT
  NC RATIO
  ATYPYA SCORE

Max number cells in table:

50 75 100 125 150 175 200

| IMAGE | NC RATIO | ATYPYA |
|-------|----------|--------|
|       | 0.636    | 0.879  |
|       | 0.626    | 0.34   |
|       | 0.594    | 0.995  |
|       | 0.586    | 0.953  |
|       | 0.559    | 0.979  |
|       | 0.538    | 0.82   |
|       | 0.526    | 0.413  |
|       | 0.519    | 0.972  |
|       | 0.499    | 0.992  |
|       | 0.492    | 0.992  |
|       | 0.435    | 0.361  |
|       | 0.423    | 0.868  |
|       | 0.415    | 0.974  |
|       | 0.39     | 0.972  |
|       | 0.385    | 0.434  |
|       | 0.379    | 0.823  |
|       | 0.363    | 0.98   |
|       | 0.35     | 0.275  |
|       | 0.345    | 0.787  |
|       | 0.298    | 0.927  |
|       | 0.295    | 0.85   |

1059  
1060  
1061

**Supplementary Figure 6: Example of identifying malignant cells in suspicious slide**

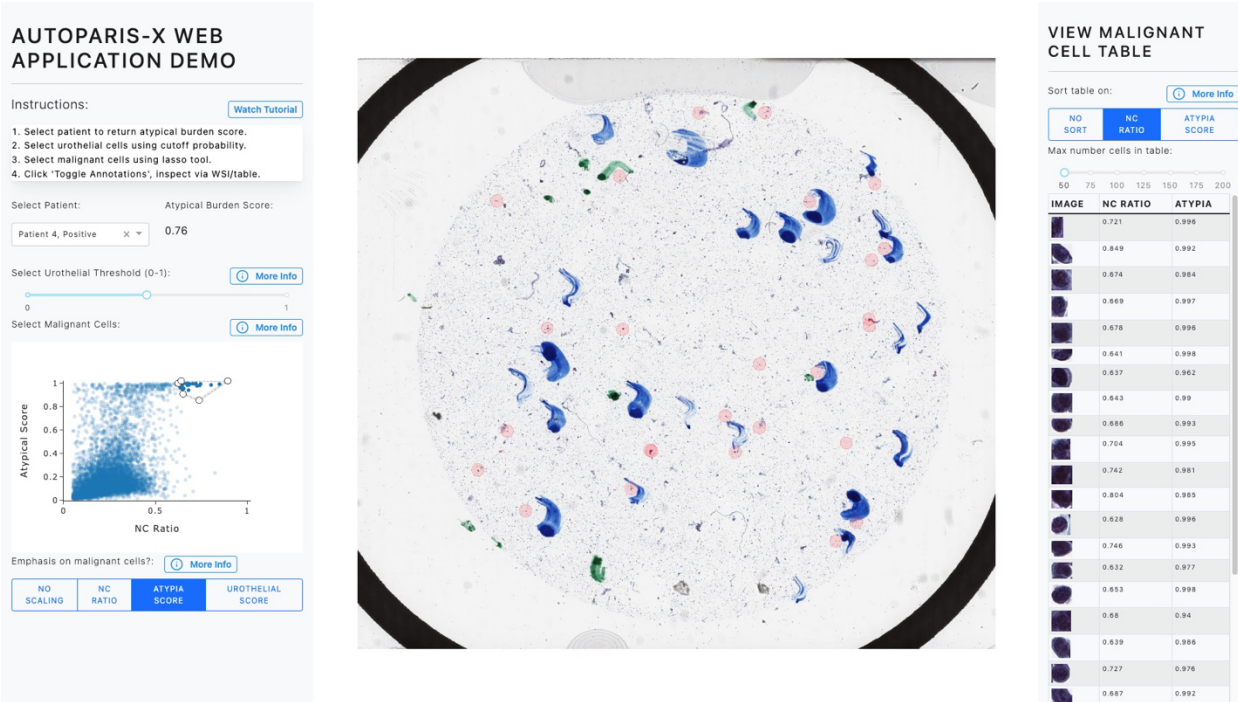

1062  
1063 **Supplementary Figure 7: Example of identifying malignant cells in positive slide, only**  
1064 **focusing on those with high atypia**  
1065

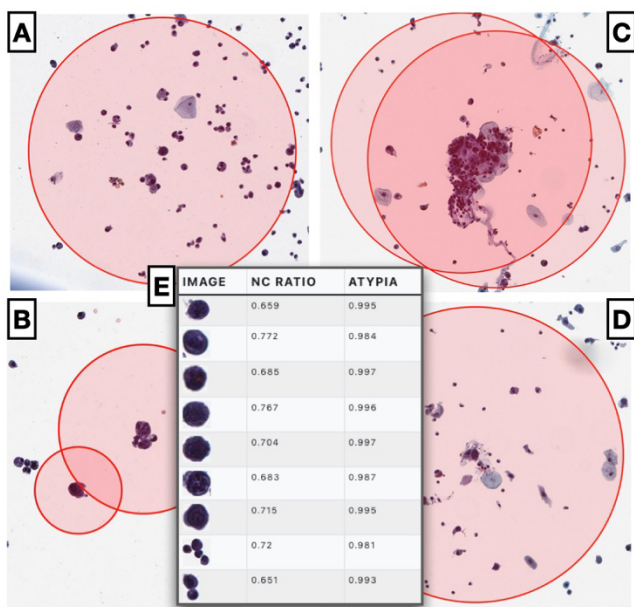

1066  
1067 **Supplementary Figure 8: Example of atypical cells identified using Autoparis-X web**  
1068 **application within demonstration on example atypical/positive slides: A) Isolated cell, B)**  
1069 **Two cells with differing atypia; cell with larger red dot has higher atypia, C-D) Focusing on**  
1070 **specific cells identified using BorderDet in hard-to-separate clusters; E) Example table of**  
1071 **malignant cells with reported atypia scores from suspicious case**  
1072  
1073
